# Supplementary material for: SERPINA1 gene identified in RNA-Seq showed strong association with milk protein concentration in Chinese Holstein cows
Source: PeerJ. 2020 Feb 24;8:e8460. doi: 10.7717/peerj.8460 (PMC7045893; doi:10.7717/peerj.8460)
Supplement: Supplemental Information 2 [file peerj-08-8460-s002.xls]

## Sheet: data
Farm	ID	ID1	Lacto	Birthdate	Year	Farmd	YS2	calving date	Monthd	Days in milk	Lactation	Sire	Dam	Gradsire	rs208607693	rs210222822	rs41257068	rs207601878	MY305	FY305	PY305	FP	PP
YIZHUANG	1	110015005723	2	2005-11-07	2005	4	13	2010-01-07	1	292	L4	11101907	110015002584	11197310	C	C	C	C	14307	378.2	389.3	2.64	2.72
SANFA	2	110046006007	2	2006-01-11	2006	9	14	2009-10-28	10	319	L4	11101907	110046001046	11194165	CG	CT	CG	CT	9802	415.5	318.7	4.24	3.25
YIZHUANG	3	110015006511	3	2006-01-25	2006	4	14	2010-12-28	12	303	L4	11101930	110015001063	11196044	CG	CT	CG	CT	13255	499.5	394	3.77	2.97
SANFA	4	110046006065	3	2006-04-14	2006	9	11	2010-09-09	9	311	L4	11101907	110046020055	11194161	G	T	G	T	10287	354.8	323.5	3.45	3.14
SANFA	5	110046006066	3	2006-04-16	2006	9	11	2010-11-12	11	282	L4	11102919	110046001202	11196018	CG	CT	CG	CT	11703	338.9	360.7	2.9	3.08
YLDCHCH	6	110054006060	3	2006-04-28	2006	2	11	2010-06-20	6	13	L1	11102919	110054004029	11189594	G	T	G	T	1808	99.7	68.8	5.51	3.81
NK4FCH	7	110037006078	3	2006-05-10	2006	6	11	2011-05-05	5	273	L4	11199095	110037003294	11100113	C	C	G	T	10236	323.6	319.8	3.16	3.12
NK3FCH	8	110038006074	2	2006-05-21	2006	7	11	2010-02-27	2	312	L4	11101907	110038003166	11197314	C	C	C	C	11626	395.3	331.3	3.4	2.85
SANFA	9	110046006079	3	2006-05-23	2006	9	11	2011-02-01	2	292	L4	11101907	110046003188	11194160	C	C	CG	CT	13080	475.8	412.6	3.64	3.15
CHY4D	10	110033006064	2	2006-06-01	2006	16	12	2009-10-10	10	302	L4	11101907	110033004084	61101043	C	C	CG	CT	11671	497.9	393.6	4.27	3.37
SANFA	11	110046006093	3	2006-06-14	2006	9	12	2010-11-02	11	292	L4	11102919	110046004035	11196018	C	C	C	C	13759	501.1	433.9	3.64	3.15
NK4FCH	12	110037006112	3	2006-06-18	2006	6	12	2010-11-06	11	304	L4	11199095	110037003240	11194108	C	C	CG	CT	12118	445.6	382.2	3.68	3.15
SANFA	13	110046006095	2	2006-06-19	2006	9	12	2010-03-17	3	305	L4	11101907	110046C98071	11193547	C	C	G	T	11060	420.9	339.9	3.81	3.07
CHY4D	14	110033006073	3	2006-06-20	2006	16	12	2010-11-01	11	318	L4	11101907	110033003006	11194108	C	C	CG	CT	13642	503.9	395.2	3.69	2.9
SANFA	15	110046006103	3	2006-06-29	2006	9	12	2011-02-03	2	290	L4	11101907	110046004040	11196018	C		CG	CT	14329	573.8	444.2	4	3.1
YLDCHCH	16	110055006129	3	2006-07-01	2006	2	12	2010-11-15	11	314	L4	11101927	110055003041	36100112	CG	CT	CG	CT	8356	281.3	290.5	3.37	3.48
SANFA	17	110046006114	2	2006-07-09	2006	9	12	2010-06-13	6	308	L4	11101907	110046020045	11194161	G	T	G	T	11162	437.6	349.6	3.92	3.13
XINPU	18	110010206136	3	2006-07-11	2006	13	12	2010-12-19	12	300	L4	11102910	110010202062	11198391	C	C	CG	CT	11295	485.1	377.1	4.29	3.34
XINPU	19	110010206150	2	2006-07-16	2006	13	12	2010-07-19	7	299	L4	11102910	110010204106	11198391	C	C	G	CT	10941	400.2	351	3.66	3.21
XINPU	20	110010206152	3	2006-07-19	2006	13	12	2010-12-11	12	275	L4	11102910	110010204040	519	CG	CT	G	T	13148	403.1	399.9	3.07	3.04
YLDCHCH	21	110055006150	2	2006-07-23	2006	2	12	2009-12-16	12	312	L4	11101929	110055001030	11195006	CG	CT	CG	CT	12384	466.1	414.6	3.76	3.35
XINPU	22	110010206164	3	2006-07-27	2006	13	12	2011-08-06	8	37	L2	11102910	110010202072	11198391	C	C	CG	CT	680	19	19.7	2.8	2.9
DRW	23	110043006111	3	2006-07-29	2006	17	12	2010-10-26	10	264	L4	11102919	110043003084	11196018	C	C	C	C	15757	537.5	444.7	3.41	2.82
SANFA	24	110046006132	3	2006-08-01	2006	9	12	2010-12-18	12	309	L4	11102919	110046001119	11194165	C	C	CG	CT	15393	489	468.9	3.18	3.05
XINPU	25	110010206190	3	2006-08-13	2006	13	12	2010-12-10	12	309	L4	11101929	110010020540	11194108	CG	CT	G	T	14340	436.8	439.8	3.05	3.07
XINPU	26	110010206206	3	2006-08-19	2006	13	12	2010-12-15	12	304	L4	11102910	110010204142	98842	C	C	CG	CT	7251	312.5	241.5	4.31	3.33
NK4FCH	27	110037006175	2	2006-08-28	2006	6	12	2010-11-17	11	237	L4	11101927	110038003053	11196018	G	T	G	T	10531	393.2	340.1	3.73	3.23
XJ1D	28	110001106147	3	2006-08-29	2006	11	12	2011-01-23	1	297	L4	11102909	110001102140	11194107	C	C	CG	CT	14509	478.9	462.2	3.3	3.19
XINPU	29	110010206220	3	2006-08-31	2006	13	12	2010-11-29	11	320	L4	11102910	110010201012	11194107	C	C	CG	CT	13052	499.6	399.5	3.83	3.06
XINPU	30	110010206224	3	2006-09-03	2006	13	13	2011-03-03	3	306	L4	11101929	110010203070	11199842	C	C	CG	CT	11731	409.3	374.5	3.49	3.19
XJ1D	31	110001106160	2	2006-09-22	2006	11	13	2010-01-02	1	310	L4	11102909	110001103083	11194166	C	C	CG	CT	13964	524	431.7	3.75	3.09
YLDCHCH	32	110005406180	3	2006-09-29	2006	2	13					11101929	110005404167		CG	CT	CG	CT
XJ1D	33	110001106187	2	2006-10-16	2006	11	13	2010-08-03	8	316	L4	11102909	110001102088	11194108	C	C	C	C	11074	462.2	366	4.17	3.3
XJ1D	34	110001106190	2	2006-10-20	2006	11	13	2010-07-07	7	315	L4	11102909	110001102165	11198391	C	C	CG	CT	12782	431.3	383.6	3.37	3
XJ1D	35	110001106193	3	2006-10-23	2006	11	13	2011-08-13	8	283	L4	11102909	110001103138	11196018	C	C	CG	CT	9339	367.7	286.7	3.94	3.07
NK4FCH	36	110037006290	3	2006-10-25	2006	6	13	2010-11-19	11	291	L4	11102909	110037001190	7175748	CG	CT	G	T	12118	439	385.5	3.62	3.18
YLDCHCH	37	110054006215	3	2006-11-01	2006	2	13					11101929	110054004314	11101930	CG	CT	CG	CT
CHY	38	110056006237	3	2006-11-17	2006	15	13					11102910	110031098412	11193550	C	C	CG	CT
CHY	39	110056006246	3	2006-11-25	2006	15	13					11102910	110056003109	11196046	C	C	CG	CT
YLDCHCH	40	110054006237	3	2006-11-26	2006	2	13					11101929	110054004311	11101908	CG	CT	G	T
CHY	41	110056006252	2	2006-11-28	2006	15	13					11102910	110056002150	11194165	C	C	G
CHY	42	110031606254	2	2006-12-02	2006	15	14					11102910	110056004160	11100260	C	C	CG	CT
NK4FCH	43	110037006343	2	2006-12-08	2006	6	14	2010-03-27	3	311	L4	11102909	110037002152	11194165	CG	CT	CG	CT	13302	503.2	414	3.78	3.11
XJ1D	44	110001106218	1	2006-12-12	2006	11	14	2009-02-10	2	301	L4	11102909	110001104102	44102025	CG	CT	CG	CT	11604	471.8	383.5	4.07	3.31
NK4FCH	45	110037006356	2	2006-12-16	2006	6	14	2010-12-09	12	305	L4	11102909	110037002153	11194165	G	T	G	T	10284	369.6	336.3	3.59	3.27
YIZHUANG	46	110015006758	3	2006-12-18	2006	4	14	2011-02-08	2	49	L2	11101907	110015004572	11198748	C	C	CG	CT	10261	375.4	309.4	3.66	3.02
XJ1D	47	110001106233	2	2006-12-22	2006	11	14	2010-09-01	9	315	L4	11102909	110001103010	11194127	C	C	C	C	12551	464.1	408.6	3.7	3.26
NK4FCH	48	110037006364	2	2006-12-23	2006	6	14	2010-10-19	10	322	L4	11102910	110037003130	11100519	C	C	G	T	14363	438.3	438	3.05	3.05
NK4FCH	49	110037006366	3	2006-12-24	2006	6	14	2011-03-09	3	301	L4	11102910	110037001092	11194165	C	C	CG	CT	12050	353.5	371.6	2.93	3.08
BJ5D	50	110023006309	1	2006-12-24	2006	10	14					11101906	110026001074	31195510	CG	CT	G	T
NK4FCH	51	110037006368	3	2006-12-25	2006	6	14	2010-10-07	10	278	L4	11102909	110037001075	11196023	C	C	C	C	12085	449.1	384.4	3.72	3.18
NK3FCH	52	110038007004	2	2007-01-10	2007	7	24	2010-12-08	12	307	L4	11102909	110038201151	11194108	G	T	G	T	12503	357.4	425.2	2.86	3.4
XINPU	53	110010207028	2	2007-01-14	2007	13	24	2010-06-22	6	291	L4	11101929	110010020716	11198391	G	T	G	T	9836	362.2	307	3.68	3.12
NK3FCH	54	110038007009	3	2007-01-15	2007	7	24	2011-03-22	3	168	L3	11102909	110038020093	11194108	CG	CT	G	T	7046	213.6	211.2	3.03	3
YLDCHCH	55	110055007024	3	2007-02-03	2007	2	24	2011-07-24	7	307	L4	11101929	110055002139	11196015	CG	CT	G	T	11871	431.9	407.9	3.64	3.44
CHY	56	110056007033	2	2007-02-03	2007	15	24					11102910	110056002015	31199001	C	C	CG	CT
YLDCHCH	57	110055007027	3	2007-02-07	2007	2	24	2011-10-02	10	146	L3	11101927	110055003024	11194165	C	C	CG	CT	8328	404	292.6	4.85	3.51
NK3FCH	58	110038007027	3	2007-02-18	2007	7	24	2011-08-15	8	142	L3	11199095	110038004189	11100260	G	T	G	T	2979	95.3	98.7	3.2	3.31
YLDCHCH	59	110055007035	3	2007-02-22	2007	2	24	2011-06-22	6	248	L4	11101929	110055003226	11100113	CG	CT	CG	CT	13673	385.6	399.9	2.82	2.92
YLDCHCH	60	110055007040	2	2007-03-02	2007	2	21	2010-05-09	5	290	L4	11101929	110055004201	11196050	CG	CT	G	T	10344	263.8	326.3	2.55	3.15
NK3FCH	61	110038007036	2	2007-03-02	2007	7	21	2011-08-28	8	309	L4	11199095	110038002031	11196046	CG	CT	G	T				2.97	3.36
NK4FCH	62	110037007072	3	2007-03-11	2007	6	21	2011-08-10	8	299	L4	11101927	110037002173		G	T	G	T	10702	319.7	343.6	2.99	3.21
NK4FCH	63	110037007079	3	2007-03-17	2007	6	21	2011-03-22	3	288	L4	11101927	110037003177	11100113	C	C	CG	CT	13205	412.6	416.7	3.12	3.16
CHY	64	110056007064	2	2007-03-21	2007	15	21					11101930	110056004036	37101411	CG	CT	G	T
CHYYZHZ	65	110032007081	3	2007-03-23	2007	14	21	2011-09-17	9	270	L4	11101927	110032004003	11100113	C	C	CG	CT	9617	381.9	302.6	3.97	3.15
CHY	66	110056007068	3	2007-03-25	2007	15	21					11101930	110056005029	31102007	C	C	C	C
CHY	67	110056007070	3	2007-03-28	2007	15	21					11102910	110056005047	11101915	C	C	CG	CT
NK4FCH	68	110037007093	2	2007-04-01	2007	6	21	2011-08-15	8	231	L4	11102910	110037003047		C	C	C	C	9090	282.7	289.7	3.11	3.19
XJ1D	69	110001107047	2	2007-04-01	2007	11	21	2010-06-26	6	233	L4	11102909	110001023343	11199090	C	C	CG	CT	10146	407.7	301	4.02	2.97
XJ1D	70	110001107050	2	2007-04-01	2007	11	21	2010-07-06	7	280	L4	11101930	110001023369	11199842	C	C	CG	CT	10899	375.1	312.6	3.44	2.87
NK3FCH	71	110038007051	3	2007-04-02	2007	7	21	2011-05-13	5	298	L4	11102909	110038099098	11194107	C	C	C	C	9968	365.1	317.1	3.66	3.18
NK3FCH	72	110038007052	2	2007-04-04	2007	7	21	2010-06-02	6	309	L4	11102909	110038003307	11100113			G	T	12310	301.7	372	2.45	3.02
NK3FCH	73	110038007053	2	2007-04-05	2007	7	21	2010-07-29	7	313	L4	11102909	110038003217	11197314	G	T	G	T	11452	384.1	354	3.35	3.09
NK3FCH	74	110038007042	3	2007-04-08	2007	7	21	2011-09-08	9	298	L4	11102909	110038004006	11197314	C	C	C	C	11610	347.6	362.6	2.99	3.12
NK3FCH	75	110038007060	2	2007-04-15	2007	7	21	2010-07-11	7	303	L4	11102909	110038013080	11198378	CG	CT	G	T	7348	239.9	239.5	3.26	3.26
NK3FCH	76	110038007062	2	2007-04-17	2007	7	21	2010-07-23	7	319	L4	11199095	110038001179	9516	C	C	G	T	12742	338.6	415.8	2.66	3.26
NK3FCH	77	110038007063	2	2007-04-18	2007	7	21	2010-07-11	7	270	L4	11199095	110038005024	2039	CG	CT	G	T	11583	372.9	367.1	3.22	3.17
NK3FCH	78	110038007070	2	2007-04-28	2007	7	21	2010-07-18	7	296	L4	11199095	110038201127	11194108	C	C	G	T	13544	436.9	415.2	3.23	3.07
CHY	79	110056007083	2	2007-04-29	2007	15	21					11101930	110056005062	11101905	CG	CT	G	T
NK3FCH	80	110038007072	3	2007-04-29	2007	7	21	2011-07-17	7	141	L3	11199095	110038003878	11194108	G	T	G	T	2344	86	81.3	3.67	3.47
NK3FCH	81	110038007073	2	2007-04-29	2007	7	21	2010-11-03	11	307	L4	11199095	110038003213	11196043	CG	CT	CG	CT	12349	383.7	378.9	3.11	3.07
NK3FCH	82	110038007086	2	2007-04-29	2007	7	21	2010-09-19	9	261	L4	11199095	110038003878	11194108	G	T	G	T	9377	340	314.3	3.63	3.35
NK4FCH	83	110037007110	3	2007-05-01	2007	6	21	2011-09-09	9	298	L4	11102910	110037003309	11100519	CG	CT	G	T	10654	330.4	340.3	3.1	3.19
XJ1D	84	110001107064	3	2007-05-01	2007	11	21	2011-07-10	7	213	L4	11102909	110001103184	11194108	C	C	CG	CT	8652	250.3	237.4	2.89	2.74
CHY	85	110056007085	3	2007-05-02	2007	15	21					11101930	110056005076	11101929	C	C	CG	CT
CHYYZHZ	86	110032007111	1	2007-05-05	2007	14	21	2009-07-20	7	266	L4	11101927	110032S00020		G	T	G	T	9457	336.2	265.8	3.55	2.81
XINPU	87	110010207118	3	2007-05-10	2007	13	21	2011-10-01	10	308	L4	11102910	110010399003		CG	CT	G	T	9359	358.8	316.9	3.83	3.39
CHY	88	110056007090	3	2007-05-11	2007	15	21					11101930	110056004043	11197351	CG	CT	G	T
NK3FCH	89	110038007081	3	2007-05-11	2007	7	21	2011-08-04	8	68	L2	11199095	110038099075	11193552	C	C	CG	CT	5598	156	165.5	2.79	2.96
CHY	90	110056007092	3	2007-05-13	2007	15	21					11101930	110056005071	11101915	C	C	C	C
CHY	91	110056007098	3	2007-05-19	2007	15	21					11101930	110056005059	11100519	C	C	CG	CT
NK3FCH	92	110038007089	1	2007-05-24	2007	7	21	2009-08-10	8	267	L4	11101907	110038003075	11100113	CG	CT	G	T	8200	340.9	265.7	4.16	3.24
NK4FCH	93	110037007126	3	2007-05-25	2007	6	21	2011-10-14	10	25	L2	11101927	110037000068	22422	C	C	C	C	3967	192.9	149.5	4.86	3.77
NK4FCH	94	110037007127	3	2007-05-25	2007	6	21	2011-08-26	8	312	L4	11102910	110037001119	11193546	C	C	CG	CT				3.8	3.39
NK3FCH	95	110038007090	2	2007-05-25	2007	7	21	2011-01-16	1	296	L4	11101907	110038003201	11100519	C	C	G	T	10692	280.3	318.9	2.62	2.98
XJ1D	96	110001107084	2	2007-05-27	2007	11	21	2010-07-29	7	293	L4	11102909	110001105042	11100113	CG	CT	G	T	13281	451.3	397.5	3.4	2.99
XJ1D	97	110001107087	3	2007-06-01	2007	11	22	2011-08-11	8	312	L4	11102909	110001024021	11199090	C	C	CG	CT	12323	426.7	389.8	3.46	3.16
XJ1D	98	110001107088	3	2007-06-01	2007	11	22	2011-10-03	10	310	L4	11102909	110001102135	11194107	CG	CT	G	T	10020	298.8	310.7	2.98	3.1
XINPU	99	110010207130	2	2007-06-03	2007	13	22	2011-07-17	7	265	L4	11101927	110010205068	11197361	C	C	CG	CT	9983	328.5	328.2	3.29	3.29
NK3FCH	100	110038007095	1	2007-06-06	2007	7	22	2009-09-10	9	297	L4	11101907	110038003273	11194108	CG	CT	CG	CT	10265	385.7	322.3	3.76	3.14
XINPU	101	110010207140	2	2007-06-07	2007	13	22	2011-06-25	6	15	L1	11101927	110010204072	11199821	G	T	G	T	1377	103.3	67.7	7.5	4.91
YLDCHCH	102	110055007083	2	2007-06-08	2007	2	22	2010-08-21	8	309	L4	11101929	110055004095	11100113	G		G		12457	424.7	423.4	3.41	3.4
NK4FCH	103	110037007146	3	2007-06-08	2007	6	22	2011-09-20	9	227	L4	11101929	110037002097	11194165	CG	CT	CG	CT	11952	391.1	395.6	3.27	3.31
NK4FCH	104	110037007149	2	2007-06-10	2007	6	22	2010-09-22	9	256	L4	11101929	110037001071	11194108	G	T	G	T	10355	403.4	330	3.9	3.19
NK3FCH	105	110038007098	2	2007-06-10	2007	7	22	2010-07-15	7	299	L4	11101907	110038013059	11198378	CG	CT	CG	CT	12088	353.7	390.3	2.93	3.23
CHY	106	110056007118	3	2007-06-15	2007	15	22					11101929	110056005109	11101917	CG	CT	CG	CT
CHY	107	110056007121	2	2007-06-16	2007	15	22					11101929	110056005125	11101917	CG	CT	CG	CT
YIZHUANG	108	110015007272	3	2007-06-18	2007	4	22	2011-08-18	8	5	L1	11101907	110015003744	11194107	CG	CT	CG	CT	404	27	21.3	6.69	5.27
NK4FCH	109	110037007155	2	2007-06-20	2007	6	22	2010-11-13	11	297	L4	11101929	110037098102	11194127	CG	CT	CG	CT	12356	464.8	381.9	3.76	3.09
NK3FCH	110	110038007107	1	2007-06-21	2007	7	22	2009-06-28	6	282	L4	11102909	110038005057	11196018	C	C	C	C	8789	368.3	293	4.19	3.33
NK3FCH	111	110038007108	1	2007-06-21	2007	7	22	2009-08-11	8	266	L4	11102909	110038005055	11196018	G	T	G	T	7553	261.2	246.6	3.46	3.26
DRW	112	1100430Z7177	2	2007-06-26	2007	17	22	2011-07-25	7	300	L4	11101930	1100430Y4049	11193546	C	C	CG		13735	504.8	473	3.68	3.44
CHY	113	110031607128	2	2007-06-27	2007	15	22					11101930	110031099059	11193541	C	C	G
XINPU	114	110010207156	2	2007-06-27	2007	13	22	2010-08-04	8	310	L4	11102910	110010198132					CT	12684	376.7	394.4	2.97	3.11
QUTOU	115	110044007137	1	2007-06-29	2007	8	22	2009-07-20	7	307	L4	11101906	110044001146	11193553	G	T	G	T	11398	411.1	352.3	3.61	3.09
NK4FCH	116	110037007166	2	2007-07-01	2007	6	22	2010-10-03	10	282	L4	11102910	110037003291	11100113	C	C	G	T	11963	448.4	393.5	3.75	3.29
NK3FCH	117	110038007114	2	2007-07-01	2007	7	22	2010-11-04	11	306	L4	11102909	110038003158	11100519	G	T	G	T	10365	332.7	343.7	3.21	3.32
XINPU	118	110010207166	3	2007-07-01	2007	13	22	2011-10-26	10	314	L4	11102910	110010204124	11101682	G	T	G	T	13514	351.2	434.9	2.6	3.22
NK3FCH	119	110038007115	3	2007-07-02	2007	7	22	2011-07-29	7	251	L4	11199095	110038003133	11197314	CG	CT	G	T	12949	344.7	382.9	2.66	2.96
YLDLZHCH	120	110071007290	1	2007-07-03	2007	3	22	2009-11-07	11	316	L4	11101930	110071004499	A00014190	C	C	G	T	13094	528.2	404.8	4.03	3.09
YLDLZHCH	121	110071007291	2	2007-07-03	2007	3	22	2010-11-29	11	300	L4	11101930	110071003006	11100120	C	C	CG	CT	14450	546.6	436.8	3.78	3.02
NK4FCH	122	110037007172	2	2007-07-03	2007	6	22	2011-03-14	3	239	L4	11101927	110037001196	11196046	CG	CT	CG	CT	8402	292.6	267.4	3.48	3.18
NK3FCH	123	110038007120	3	2007-07-05	2007	7	22	2011-08-01	8	308	L4	11102909	110038023393	11197314	CG	CT	CG	CT	11807	373.7	388.3	3.17	3.29
XJ1D	124	110001107112	1	2007-07-05	2007	11	22	2009-12-16	12	299	L4	11102909	110001102060	11194107	C	C	C	C	9927	432.8	315.5	4.36	3.18
XJ1D	125	110001107114	3	2007-07-05	2007	11	22	2011-08-17	8	306	L4	11102909	110001097181	11194127	C	C		CT	11895	340	378.6	2.86	3.18
NK3FCH	126	110038007123	2	2007-07-06	2007	7	22	2010-07-07	7	307	L4	11199095	110038004048	11196019	C	C	G	T	9683	295.7	300.6	3.05	3.1
NK3FCH	127	110038007124	3	2007-07-07	2007	7	22	2011-08-29	8	252	L4	11199095	110038013045	11198378	C	C	CG	CT	9851	305.7	301.9	3.1	3.06
NK3FCH	128	110038007125	1	2007-07-07	2007	7	22	2009-07-26	7	310	L4	11199095	110038013054	11198378	CG	CT	G	T	10167	359.3	315.5	3.53	3.1
CHYYZHZ	129	110032007150	1	2007-07-08	2007	14	22	2009-07-18	7	296	L4	11197314	110032002218	11196044	CG	CT	CG	CT	7910	334.2	267.9	4.22	3.39
YLDCHCH	130	110055007094	3	2007-07-09	2007	2	22	2011-07-16	7	8	L1	11101927	110055005095	11196100	G	T	G	T	562	37	23.9	6.59	4.26
CHY	131	110056007138	2	2007-07-10	2007	15	22					11102910	110056002034	11193546	CG	CT	G	T
XINPU	132	110010207207	2	2007-07-10	2007	13	22	2010-10-13	10	297	L4	11101927	110010204138	11199842	C	C	CG	CT	11453	390.1	386.2	3.41	3.37
YLDLZHCH	133	110071007305	2	2007-07-12	2007	3	22	2010-09-25	9	302	L4	11101930	110071001133	11193546	C	C	C	C	8049	313.9	262.5	3.9	3.26
XJ1D	134	110001107118	2	2007-07-12	2007	11	22	2010-08-11	8	308	L4	11102909	110001104043	11100113	C	C	C	C	12554	397.1	412.5	3.16	3.29
YLDLZHCH	135	110071007307	3	2007-07-14	2007	3	22	2011-09-27	9	33	L2	11101930	110071005132	11194166	CG	CT	G	T	9288	362.2	315.8	3.9	3.4
CHY	136	110056007141	3	2007-07-15	2007	15	22					11101927	110056003113	11100113	CG	CT	CG	CT
CHY	137	110056007146	2	2007-07-22	2007	15	22					11102910	110056001228	11194165	C		G
XJ1D	138	110001107130	2	2007-07-23	2007	11	22	2011-08-14	8	94	L2	11103543	110001105039	64102315	C	C	CG	CT	1428	44.9	45.9	3.14	3.21
CHY	139	110056007150	3	2007-07-27	2007	15	22					11101927	110056002130	11199815	C	C	CG	CT
SANFA	140	110046007129	1	2007-07-29	2007	9	22	2009-09-22	9	299	L4	11102919	110046005062	11196100	CG	CT	CG	CT	10774	385.8	330.7	3.58	3.07
CHY	141	110056007151	3	2007-07-30	2007	15	22					11102910	110056003124	11194138	CG	CT	G	T
CHY	142	110056007155	3	2007-07-31	2007	15	22					11101927	110056004115	11199821	G	T	G	T
XINPU	143	110010207246	2	2007-08-02	2007	13	22	2011-02-25	2	312	L4	11101927	110010201150	11198391	CG	CT	CG	CT	14055	442.1	429.3	3.15	3.05
XINPU	144	110010207247	3	2007-08-03	2007	13	22	2011-12-03	12	309	L4	11101927	110010205102	11199842	CG	CT	G	T	10122	395.4	328.2	3.91	3.24
NK4FCH	145	110037007215	3	2007-08-07	2007	6	22	2011-10-28	10	279	L4	11199095	110037004151	11101905	CG	CT	CG	CT	12684	360.3	401.8	2.84	3.17
NK4FCH	146	110037007217	3	2007-08-08	2007	6	22	2011-11-03	11	306	L4	11102910	110037004050	11198748	CG	CT	CG	CT	9238	319.3	285.4	3.46	3.09
NK3FCH	147	110038007143	2	2007-08-10	2007	7	22	2010-07-30	7	312	L4	11102909	110038013015	11198378	CG	CT	CG	CT	13377	431.5	431.5	3.23	3.23
NK4FCH	148	110037007220	1	2007-08-11	2007	6	22	2010-02-21	2	288	L4	11199095	110037004237	11100260	C	C	C	C	10176	305.7	321.7	3	3.16
NK3FCH	149	110038007145	3	2007-08-13	2007	7	22	2011-08-15	8	294	L4	11101907	110038024100	2830	CG	CT	CG	CT	10647	400.2	356	3.76	3.34
NK3FCH	150	110038007148	2	2007-08-14	2007	7	22	2011-04-01	4	278	L4	11102909	110038003200	11100519	C	C	C	C	12520	338.3	388.3	2.7	3.1
NK3FCH	151	110038007150	1	2007-08-15	2007	7	22	2009-08-24	8	253	L4	11102909	110038005083	11196018	C	C	G	T	9416	280.4	303	2.98	3.22
YLDLZHCH	152	110071007390	2	2007-08-18	2007	3	22	2010-10-20	10	312	L4	11101930	110071005522	S05027830	C	C	CG	CT	10765	401.3	335.1	3.73	3.11
NK3FCH	153	110038007154	2	2007-08-19	2007	7	22	2010-11-13	11	297	L4	11102909	110038013041	151-966	CG	CT	CG	CT	12367	324	390.9	2.62	3.16
NK3FCH	154	110038007155	3	2007-08-19	2007	7	22	2011-10-30	10	309	L4	11102909	110038004108	11196018	C	C	CG	CT	12680	429.7	413.3	3.39	3.26
XINPU	155	110010207279	2	2007-08-19	2007	13	22	2010-10-12	10	241	L4	11101927	110010200526		G	T	G	T	9455	290.5	290.9	3.07	3.08
NK3FCH	156	110038007158	2	2007-08-20	2007	7	22	2010-10-01	10	277	L4	11101907	110038003094	11196018	CG	CT	CG	CT	12412	359.4	407.7	2.9	3.28
NK3FCH	157	110038007161	2	2007-08-21	2007	7	22	2011-06-19	6	16	L1	11102909	110038002002	11196046	C	C	C	C	3884	119.7	149.6	3.08	3.85
XINPU	158	110010207285	2	2007-08-22	2007	13	22	2011-02-11	2	302	L4	11101927	110010098134	11193549	CG	CT	G	T	13147	444	387.7	3.38	2.95
YLDLZHCH	159	110071007399	3	2007-08-24	2007	3	22	2011-08-06	8	246	L4	11101930	110071005142	11100113	C	C	G		11571	327.9	393.6	2.83	3.4
XINPU	160	110010207287	3	2007-08-24	2007	13	22	2011-10-01	10	276	L4	11101927	110010204240	11199842	G	T	G	T	11686	348.2	361.9	2.98	3.1
YLDLZHCH	161	110071007407	2	2007-08-28	2007	3	22	2011-11-24	11	290	L4	11100113	110071002383	11197026	C	C	G		13432	466.6	410.3	3.47	3.05
YLDLZHCH	162	110071007408	2	2007-08-29	2007	3	22	2010-10-05	10	292	L4	11101930	110071005534		C	C	C	C	12162	416	370.8	3.42	3.05
YLDLZHCH	163	110071007416	3	2007-09-01	2007	3	23	2011-10-14	10	303	L4	11101930	110071004189	11100519	C	C	CG	CT	12851	443.9	395.3	3.45	3.08
NK3FCH	164	110038007171	2	2007-09-01	2007	7	23	2011-07-21	7	319	L4	11199095	110038013044	11198391	C	C	G	T	13167	481.4	424	3.66	3.22
XINPU	165	110010207294	3	2007-09-02	2007	13	23	2011-11-07	11	271	L4	11101927	110010204058	11199821	CG	CT	CG	CT	6034	296.2	203.5	4.91	3.37
NK3FCH	166	110038007173	2	2007-09-03	2007	7	23	2011-07-13	7	299	L4	11199095	110038098036	11193541	C	C	CG	CT	10472	342.8	350.3	3.27	3.35
YLDXW	167	110064007168	2	2007-09-10	2007	12	23	2011-10-26	10	51	L2	11199995	110064002062	11194166	C	C	C	C	1794	98.7	68.2	5.5	3.8
YLDLZHCH	168	110071007429	1	2007-09-11	2007	3	23	2009-09-04	9	296	L4	11101930	110071005674	H01144432	C	C	CG	CT	12272	462	362.8	3.76	2.96
NK4FCH	169	110037007276	2	2007-09-11	2007	6	23	2011-08-06	8	303	L4	11199095	110037202176	11198378	C	C	G	T	11736	354	371.1	3.02	3.16
NK3FCH	170	110038007179	1	2007-09-11	2007	7	23	2009-11-09	11	296	L4	11102919	110038004064	11196019	CG	CT	G	T	13109	434.3	421.1	3.31	3.21
XINPU	171	110010207307	2	2007-09-14	2007	13	23	2011-11-23	11	108	L2	11100113	110010099018	36196011	C	C	G	T	9802	386.8	270.2	3.95	2.76
NK3FCH	172	110038007187	2	2007-09-16	2007	7	23	2011-09-21	9	315	L4	11102919	110038013006	11198391	CG	CT	G	T	13855	357.4	418.8	2.58	3.02
YLDXW	173	110064007175	1	2007-09-18	2007	12	23	2009-10-10	10	309	L4	11100113	110064004179	11196046	CG	CT	G	T	10805	402.7	342.1	3.73	3.17
CHY	174	110056007190	3	2007-09-20	2007	15	23					11101927	110056004124	11196044	CG		G	T
YIZHUANG	175	110015007496	2	2007-09-24	2007	4	23	2010-12-24	12	307	L4	11101929	110015004352	1057935	G	T	G	T	10857	370.8	347.8	3.42	3.2
CHY	176	110056007195	3	2007-09-25	2007	15	23					11101927	110056003167	11199090	G	T	G	T
NK4FCH	177	110037007300	3	2007-10-01	2007	6	23	2011-07-16	7	201	L3	11102910	110037003144	11100113	CG	CT	G	T	10694	323.1	348.7	3.02	3.26
XINPU	178	110010207354	3	2007-10-02	2007	13	23	2011-09-16	9	291	L4	11101927	110010203016	3610067	C	C	C	C	7831	243.7	257	3.11	3.28
XINPU	179	110010207356	2	2007-10-03	2007	13	23	2011-01-25	1	291	L4	11101927	110010201124	11193546	C	C	CG	CT	10320	359	307.1	3.48	2.98
NK4FCH	180	110037007309	3	2007-10-05	2007	6	23	2011-07-24	7	253	L4	11199095	110037004201	11196018	C	C	C	C	10091	277.7	319.5	2.75	3.17
BJ5D	181	110023007221	1	2007-10-07	2007	10	23					11102912	110026005114	11199842	C	C	G	T
XINPU	182	110010207368	2	2007-10-08	2007	13	23	2011-06-26	6	286	L4	11101927	110010205218	12103154	CG	CT	CG	CT	13642	430.7	422.4	3.16	3.1
XINPU	183	110010207369	1	2007-10-09	2007	13	23	2010-01-07	1	303	L4	11101927	110010205144	11199842	CG	CT	CG	CT	10359	497.3	328.6	4.8	3.17
YLDLZHCH	184	110071007496	2	2007-10-11	2007	3	23	2010-12-31	12	268	L4	11101930	110071004607	A00010062	C	C	G		16040	632.2	453.9	3.94	2.83
YLDLZHCH	185	110071007498	2	2007-10-12	2007	3	23	2011-06-12	6	301	L4	11101930	110071005668	H01144432	C	C	G	CT	12507	453.8	364.9	3.63	2.92
YLDLZHCH	186	110071007503	1	2007-10-14	2007	3	23	2010-02-23	2	271	L4	11101930	110071005494	H00940602	C	C	CG	CT	9494	332.9	284.5	3.51	3
YLDLZHCH	187	110071007505	1	2007-10-14	2007	3	23	2010-01-17	1	308	L4	11101930	110071003194	11199821	C	C	G		11937	397.8	339	3.33	2.84
YLDLZHCH	188	110071007508	2	2007-10-14	2007	3	23	2011-10-05	10	312	L4	11101930	110071005688	H01156559	CG	CT	CG	CT	10354	346	329.8	3.34	3.18
XINPU	189	110010207382	1	2007-10-15	2007	13	23	2009-12-08	12	333	L4	11101927	110010204150	11197361	C	C	C	C	10161	317.6	318.6	3.13	3.14
XJ1D	190	110001107189	1	2007-10-16	2007	11	23	2009-09-17	9	298	L4	11102909	110001104132	11196044	CG	CT	CG	CT	8301	335.1	267.7	4.04	3.22
XJ1D	191	110001107191	2	2007-10-17	2007	11	23	2011-02-21	2	268	L4	11102909	110001101235	11196018	G	T	G	T	12033	457.2	373.8	3.8	3.11
YIZHUANG	192	110015007542	3	2007-10-18	2007	4	23	2011-12-03	12	269	L4	11101929	110015005697	11102396	CG	CT	CG	CT	12385	449.1	397.1	3.63	3.21
CHY	193	110056007215	2	2007-10-19	2007	15	23					11101929	110056002075	11197351	CG	CT	CG	CT
YLDLZHCH	194	110071007515	1	2007-10-20	2007	3	23	2010-03-20	3	309	L4	11101930	110071005235	23103228	C	C	C	C	12139	403.6	322.8	3.33	2.66
NK4FCH	195	110037007322	1	2007-10-20	2007	6	23	2010-08-12	8	297	L4	11199095	110037005161	11101907	CG	CT	CG	CT	10520	399.8	341.4	3.8	3.24
NK4FCH	196	110037007323	3	2007-10-21	2007	6	23	2011-08-29	8	309	L4	11199095	110037005097	11100260	C	C	CG	CT				3.18	2.98
NK4FCH	197	110037007324	1	2007-10-21	2007	6	23	2009-11-01	11	245	L4	11199095	110037005019	11196018	C	C	CG	CT	9362	312.8	284.9	3.34	3.04
YLDLZHCH	198	110071008047	2	2007-10-26	2007	3	23	2011-02-13	2	287	L4	11101930	110071005480	H00940602	C	C	G	CT	10384	373.1	320.9	3.59	3.09
NK4FCH	199	110037007342	2	2007-10-29	2007	6	23	2011-08-12	8	297	L4	11199095	110037005256	11102910	CG	CT	G	T	14134	471.1	438.3	3.33	3.1
CHY	200	110031607221	2	2007-11-02	2007	15	23	2011-05-12	5	299	L4	11101929	110056003063	11100519	G	T	G	T	13398	452.5	395.8	3.38	2.95
SANFA	201	110046007219	2	2007-11-03	2007	9	23	2011-09-27	9	292	L4	11102919	110046004091	11196100	CG	CT	CG	CT	9881	297.7	315.2	3.01	3.19
SANFA	202	110046007221	1	2007-11-03	2007	9	23	2010-02-01	2	322	L4	11102919	110046004105	11196100	G	T	G	T	11966	426.2	363.3	3.56	3.04
DRW	203	110043007226	2	2007-11-04	2007	17	23	2011-07-27	7	298	L4	11100113	110043005189	11100519	C	C	C	C	13288	432.3	417.9	3.25	3.14
CHY	204	110056007225	1	2007-11-07	2007	15	23					11101929	110056005204	132797429	G	T	G	T
YLDLZHCH	205	110071007556	2	2007-11-08	2007	3	23	2010-12-31	12	331	L4	11101930	110071005448	A00011322	C	C	G		14563	611.3	481.8	4.2	3.31
YLDCHCH	206	110055007138	1	2007-11-09	2007	2	23	2010-02-13	2	316	L4	11102919	110055099143	11193544	CG	CT	CG	CT	12300	510	379.8	4.15	3.09
SANFA	207	110046007232	2	2007-11-18	2007	9	23	2011-09-18	9	335	L4	11102919	110046001143	11194165	CG	CT	CG	CT				3.94	3.08
NK3FCH	208	110038007217	2	2007-11-22	2007	7	23	2010-12-09	12	271	L4	11199095	110038094269	401305	C	C	G	T	11198	375.4	332.2	3.35	2.97
SANFA	209	110046007236	1	2007-11-26	2007	9	23	2010-04-04	4	321	L4	11102919	110046005155		C	C	C	C	11763	439.7	349	3.74	2.97
YIZHUANG	210	110015007617	1	2007-12-01	2007	4	24	2010-05-10	5	232	L4	11101902	110015003288	1007848	G		G	T	12524	425.6	379.8	3.4	3.03
NK3FCH	211	110038007222	1	2007-12-01	2007	7	24	2010-02-22	2	317	L4	11199095	110038001155	11196046	CG	CT	CG	CT	8132	243.2	273.6	2.99	3.36
YLDLZHCH	212	110071007589	1	2007-12-06	2007	3	24	2010-06-10	6	318	L4	11101930	110071005565		C	C	CG	CT	13768	513.7	410.4	3.73	2.98
YIZHUANG	213	110015007625	1	2007-12-07	2007	4	24	2010-06-11	6	319	L4	11101907	110015004580	11194115		CT	G	T	10079	380.3	337.3	3.77	3.35
XJ1D	214	110001107231	2	2007-12-08	2007	11	24	2010-10-14	10	300	L4	11102909	110001104094	7175748	C	C	C	C	11412	482.1	359.2	4.22	3.15
YIZHUANG	215	110015007629	2	2007-12-09	2007	4	24	2011-03-11	3	291	L4	11101907	110015001184	11194108	C	C	G	T	15097	482.6	478.7	3.2	3.17
XJ1D	216	110001107232	1	2007-12-10	2007	11	24	2009-12-19	12	296	L4	11102909	110001105188	11101917	C	C	CG	C	10801	366.8	351.2	3.4	3.25
NK3FCH	217	110038007225	1	2007-12-11	2007	7	24	2009-12-25	12	311	L4	11199095	110038002109	11197314	CG	CT	CG	CT	8948	326.3	281.8	3.65	3.15
YIZHUANG	218	110015007630	2	2007-12-12	2007	4	24	2011-07-14	7	257	L4	11101907	110015005346		C	C	CG	CT	9192	342.1	300.2	3.72	3.27
YIZHUANG	219	110015007636	2	2007-12-15	2007	4	24	2011-08-14	8	318	L4	11101907	110015002733	11196015	C	C	CG	CT	12470	504.6	381.6	4.05	3.06
YIZHUANG	220	110015007638	2	2007-12-15	2007	4	24	2011-06-15	6	314	L4	11101907	110015004609	11199095	C	C	G	T	9569	376.7	312.5	3.94	3.27
NK3FCH	221	110038007233	2	2007-12-16	2007	7	24	2011-08-21	8	316	L4	11199095	110038003276	11100113	CG		G					3.61	3.35
CHY	222	110056007251	2	2007-12-17	2007	15	24					11101927	110056003173	11196043	CG	CT	G	T
YLDLZHCH	223	110071007600	2	2007-12-17	2007	3	24	2011-06-22	6	291	L4	11101930	110071002052	11194127	CG	CT	G		13053	425.9	398.7	3.26	3.05
YIZHUANG	224	110015007641	2	2007-12-17	2007	4	24	2011-06-16	6	313	L4	11101907	110015001005	11195021	CG	CT	G	T	13249	467.7	408.3	3.53	3.08
YIZHUANG	225	110015007642	2	2007-12-17	2007	4	24	2011-06-06	6	295	L4	11101907	110015003692	11100113	CG	CT	CG	CT	13074	486.7	417.1	3.72	3.19
CHY	226	110056007253	1	2007-12-18	2007	15	24					11101929	110056001089	11102919	G	T	G	T
CHY	227	110056007255	2	2007-12-20	2007	15	24					11101929	110056002216	11193544	CG	CT	CG	CT
NK4FCH	228	110037007405	2	2007-12-20	2007	6	24	2011-08-09	8	300	L4	11199095	110037004211	13102313	C	C	CG	CT	13003	421.9	420.1	3.24	3.23
NK3FCH	229	110038007236	2	2007-12-20	2007	7	24	2011-07-02	7	31	L2	11199095	110038004124	11101914	C	C	CG	CT	9865	301.1	285.3	3.05	2.89
XJ1D	230	110001107237	2	2007-12-20	2007	11	24	2011-03-05	3	312	L4	11102909	110001103126	11199815	CG	CT	CG	CT	12344	411.6	364.1	3.33	2.95
XINPU	231	110010207495	2	2007-12-22	2007	13	24	2011-05-17	5	298	L4	11101927	110010205232	61103050	CG	CT	G	T	12334	425.6	364.9	3.45	2.96
YLDXW	232	110064007235	1	2007-12-23	2007	12	24	2010-02-07	2	314	L4	11197314	110064005230	13102603	C	C	C	C	10837	372.8	330.1	3.44	3.05
CHY	233	110056007264	1	2007-12-24	2007	15	24					11101929	110056001222	11196050	CG	CT	CG	CT
YLDLZHCH	234	110071007612	2	2007-12-24	2007	3	24	2011-03-28	3	321	L4	11101930	110071099073	11194108	CG	CT	G	T	13509	486.8	379	3.6	2.81
CHY4D	235	110033007202	2	2007-12-25	2007	16	24	2011-09-24	9	289	L4	11102912	110033004185	11100113	C	C	G	T	8607	271.2	258.3	3.15	3
XJ1D	236	110001107240	2	2007-12-25	2007	11	24	2011-02-20	2	269	L4	11102909	110001105176	11101917	C	C	CG	CT	12290	279.6	379.4	2.27	3.09
YLDXW	237	110064007238	2	2007-12-27	2007	12	24	2011-08-26	8	162	L3	11199995	110064000046	5078205	CG	CT	CG	CT	10371	314.1	316.2	3.03	3.05
YIZHUANG	238	110015007653	1	2007-12-28	2007	4	24	2010-09-06	9	262	L4	11101907	110015005732	11197580	CG	CT	G	T	12939	493.5	415.3	3.81	3.21
XINPU	239	110010207507	1	2007-12-30	2007	13	24	2010-04-24	4	289	L4	11101927	110010204250	2311	CG	CT	G	T	8596	315.7	256.3	3.67	2.98
CHY	240	110056008001	1	2008-01-01	2008	15	34					11101929	110056004235	11196035	CG	CT	G	T
XJ1D	241	110001108001	2	2008-01-01	2008	11	34	2011-02-18	2	299	L4	11102909	110001101175	11197361	CG	CT	CG	CT	12292	409.2	354.1	3.33	2.88
XJ1D	242	110001108002	2	2008-01-01	2008	11	34	2011-08-19	8	304	L4	11102909	110001104172	11100113	CG	CT	CG	CT	13711	456	457.3	3.33	3.33
YLDLZHCH	243	110071008007	1	2008-01-03	2008	3	34	2010-03-07	3	294	L4	11101930	110071005336	11100113	C	C	CG	CT	11959	334.9	341	2.8	2.85
XINPU	244	110010208010	2	2008-01-04	2008	13	34	2011-10-05	10	185	L3	11101927	110010205324	11197361	C	C	CG	CT	10095	362.6	306.8	3.59	3.04
YIZHUANG	245	110015008006	1	2008-01-05	2008	4	34	2010-03-11	3	292	L4	11102129	110015004813	1094178	C	C	CG	C	11196	425.8	356.3	3.8	3.18
NK3FCH	246	110038008004	2	2008-01-05	2008	7	34	2011-11-02	11	125	L3	11102909	110038004131	11101914	G	T	G	T	7127	248.8	215.6	3.49	3.03
XJ1D	247	110001108004	2	2008-01-05	2008	11	34	2011-10-13	10	300	L4	11102909	110001103164	11194108	CG	CT	CG	CT	11216	397.8	351.1	3.55	3.13
NK3FCH	248	110038008008	2	2008-01-06	2008	7	34	2011-07-08	7	95	L2	11102909	110038004155	11197351	C	C	CG	CT	6624	195.1	189.5	2.95	2.86
XJ1D	249	110001108006	2	2008-01-06	2008	11	34	2011-08-26	8	270	L4	11102909	110001105183	11101917	CG	CT	CG	CT	8700	343.2	262.6	3.95	3.02
YLDXW	250	110064008001	2	2008-01-06	2008	12	34	2011-10-11	10	307	L4	11199995	110064002095	23199202	C	C	CG	CT	7332	244.1	215.9	3.33	2.94
NJTH	251	110017A08017	1	2008-01-06	2008	5	34	2010-03-12	3	314	L4	11101916	110071004053	37101411	C	C	CG	C	11411	530.3	366.9	4.65	3.22
SANFA	252	110046008003	1	2008-01-07	2008	9	34	2010-02-19	2	304	L4	11102919	110046005183	11196100	C	C	CG	C	12120	409.6	362.4	3.38	2.99
NK3FCH	253	110038008009	1	2008-01-08	2008	7	34	2010-01-17	1	288	L4	11102909	110038002022	11196046	C	C	C	C	9441	338.7	301.9	3.59	3.2
BANHE	254	110045008013	2	2008-01-11	2008	1	34	2011-06-24	6	296	L4	11102919	110045003206	11196018	C	C	CG	CT	11676	364.7	384	3.12	3.29
XJ1D	255	110001108011	1	2008-01-11	2008	11	34	2010-06-17	6	299	L4	11102909	110001103058	11198391	CG	CT	G	T	11164	421.6	352.5	3.78	3.16
YLDLZHCH	256	110071008026	1	2008-01-13	2008	3	34	2010-04-04	4	294	L4	11102919	110071004281	11100113	C	C	C	C	12275	446.2	342.3	3.64	2.79
BANHE	257	110045008016	2	2008-01-14	2008	1	34	2011-10-04	10	285	L4	11102919	110045005227	11197314	G	T	G	T	12278	320.7	403.2	2.61	3.28
BANHE	258	110045008018	1	2008-01-14	2008	1	34	2010-06-27	6	294	L4	11102919	110045003124	11196018	C	C	CG		12113	375.1	352.2	3.1	2.91
BANHE	259	110045008019	1	2008-01-15	2008	1	34	2010-07-05	7	319	L4	11102919	110045002198	11194127	CG	CT	CG	CT	10603	441	346.3	4.16	3.27
YLDLZHCH	260	110071008029	2	2008-01-15	2008	3	34	2011-08-29	8	314	L4	11102919	110071003276	11194138	CG	CT	G	T				4.05	3.32
BANHE	261	110045008022	2	2008-01-17	2008	1	34	2011-06-27	6	293	L4	11102919	110045004206	11196018	CG	CT	CG	CT	10833	401.4	372.2	3.71	3.44
YIZHUANG	262	110015008025	1	2008-01-18	2008	4	34	2010-03-17	3	314	L4	11101902	110015004438	1056527	CG	CT	G	T	11101	435.1	371.9	3.92	3.35
NK4FCH	263	110037008020	1	2008-01-19	2008	6	34	2010-01-15	1	290	L4	11102909	110037004340	11100260	CG	CT	G	T	10258	301.3	317.8	2.94	3.1
CHY4D	264	110033008004	2	2008-01-20	2008	16	34	2011-07-18	7	269	L4	11197314	110033003160	11199842	C	C	CG	CT	9738	342.2	301.6	3.51	3.1
DRW	265	110043008024	2	2008-01-20	2008	17	34	2010-12-22	12	305	L4	11101929	110043002234	11196018	C	C	C	C	14005	553.3	450	3.95	3.21
YLDLZHCH	266	110071008039	1	2008-01-21	2008	3	34	2010-03-20	3	309	L4	11102919	110071005343	11198748	C	C	CG	C	11359	466.2	345.6	4.1	3.04
YLDLZHCH	267	110071008040	1	2008-01-21	2008	3	34	2010-04-14	4	315	L4	11101930	110071005197	11196044	C	C	C	C	12488	481.3	374.7	3.85	3
XINPU	268	110010208031	2	2008-01-21	2008	13	34	2011-09-24	9	315	L4	11101927	110010198066		CG	CT	G	T	12334	451.9	390.2	3.66	3.16
CHY	269	110056008021	1	2008-01-22	2008	15	34					11100113	110056001211	11196015	CG	CT	G	T
YLDLZHCH	270	110071008042	2	2008-01-23	2008	3	34	2011-06-28	6	257	L4	11102919	110071002126	11197310	CG	CT	CG	CT	8765	330.2	272.2	3.77	3.11
QUTOU	271	110044008015	2	2008-01-23	2008	8	34	2011-09-10	9	260	L4	11101906	110044004206	11196023	C	C	CG	CT	11054	363.5	356.6	3.29	3.23
NK3FCH	272	110038008017	2	2008-01-24	2008	7	34	2011-07-11	7	301	L4	11102909	110038002070	11194107	CG	CT	G	T	14261	439.1	461.4	3.08	3.24
NJTH	273	110017A08045	2	2008-01-24	2008	5	34	2011-09-23	9	143	L3	11101916	110071002013	11196015		CT			10154	404.5	327.4	3.98	3.22
CHYYZHZ	274	110032008022	2	2008-01-25	2008	14	34	2011-03-04	3	313	L4	11101927	110032005069	11196018	G	T	G	T	15702	484.1	449.7	3.08	2.86
CHYYZHZ	275	110032008023	1	2008-01-25	2008	14	34	2010-07-29	7	292	L4	11100113	110032003193	11198748	C	C	CG	CT	10173	404.4	334.3	3.98	3.29
CHYYZHZ	276	110032008026	1	2008-01-26	2008	14	34	2010-02-24	2	321	L4	11197314	110032005266	11101927	G	T	G	T	11305	353.5	338	3.13	2.99
NK4FCH	277	110037008029	1	2008-01-26	2008	6	34	2010-03-01	3	309	L4	11102909	110037Y98102	11194166	CG	CT	G	T	10004	343.8	321.9	3.44	3.22
DRW	278	110043008031	2	2008-01-26	2008	17	34	2011-05-29	5	294	L4	11101929	110043005006	11196035	CG	CT	G	T	10169	326.6	308.2	3.21	3.03
YLDXW	279	110064008017	1	2008-01-27	2008	12	34	2010-02-17	2	304	L4	11197314	110064005254	31103411	CG	CT	CG	CT	10478	361.8	331.4	3.45	3.16
CHY4D	280	110033008008	2	2008-01-28	2008	16	34	2011-09-02	9	249	L4	11197314	110033006001	13203023	C	C	C	C	10187	361.1	317.7	3.54	3.12
YLDLZHCH	281	110071008043	1	2008-01-28	2008	3	34	2010-04-19	4	310	L4	11101916	110071002094	31195510	C	C	C	C	12943	549.9	384.7	4.25	2.97
XJ1D	282	110001108026	2	2008-01-28	2008	11	34	2011-08-19	8	304	L4	11102129	110001105229	11102909	CG	CT	G	T	8734	298.5	280.8	3.42	3.21
BANHE	283	110045008033	1	2008-01-29	2008	1	34	2010-04-01	4	289	L4	11102919	110045000002	11196100	G	T	G	T	11476	427.1	346.7	3.72	3.02
YLDXW	284	110064008018	2	2008-01-29	2008	12	34	2011-07-25	7	293	L4	11197314	110064005263	31103409	CG	CT	G	T	10999	422.9	383.1	3.84	3.48
BANHE	285	110045008034	2	2008-01-30	2008	1	34	2011-09-26	9	293	L4	11102919	110045005232	11197314	G	T	G	T	6572	227.1	213.3	3.46	3.25
BANHE	286	110045008036	1	2008-01-31	2008	1	34	2010-11-14	11	308	L4	11101906	110045004091	11101905	CG	CT	CG	CT	13405	439.7	396.3	3.28	2.96
NK3FCH	287	110038008023	1	2008-02-01	2008	7	34	2010-02-20	2	319	L4	11199095	110038005190	11101907	CG	CT	G	T	11794	394.7	378.7	3.35	3.21
XINPU	288	110010208048	2	2008-02-02	2008	13	34	2011-08-18	8	292	L4	11101927	110010204318	11199842	G	T	G	T	9022	330.9	302	3.67	3.35
DRW	289	110043008037	2	2008-02-02	2008	17	34	2011-03-18	3	303	L4	11101929	110043004231	11196019	C	C	G	T	9868	350.4	302.9	3.55	3.07
CHY4D	290	110033008012	2	2008-02-05	2008	16	34	2011-04-28	4	258	L4	11197314	110033006004	11100260	CG	CT	CG	CT	12322	498.6	378.2	4.05	3.07
CHYYZHZ	291	110032008033	1	2008-02-05	2008	14	34	2010-03-20	3	297	L4	11199095	110032004200	11101927	CG	CT	CG	CT	8958	363.4	274.6	4.06	3.07
BANHE	292	110045008041	2	2008-02-07	2008	1	34	2011-09-25	9	294	L4	11102919	1100450W3230	11196018	CG	CT	CG	CT	11904	425.8	413.5	3.58	3.47
NK3FCH	293	110038008028	2	2008-02-07	2008	7	34	2011-07-01	7	311	L4	11199095	110038004176	11197314	CG	CT	CG		11016	345.1	354.6	3.13	3.22
XJ1D	294	110001108033	2	2008-02-08	2008	11	34	2011-09-10	9	305	L4	11102129	110001104135	11101927	C	C	G	T	2392	85.3	72.9	3.57	3.05
BANHE	295	110045008042	2	2008-02-09	2008	1	34	2011-08-14	8	245	L4	11102919	110045005267	11197314	G	T	G	T	10331	297.2	341.1	2.88	3.3
BANHE	296	110045008043	2	2008-02-09	2008	1	34	2011-08-24	8	270	L4	11102919	110045006004	11197314	CG	CT	G	T	11130	300	358.7	2.7	3.22
CHYYZHZ	297	110032008037	2	2008-02-09	2008	14	34	2011-06-22	6	295	L4	11197314	110032002146	11199815	CG	CT	CG	CT	7819	284.7	257.8	3.64	3.3
CHYYZHZ	298	110032008038	2	2008-02-10	2008	14	34	2011-04-19	4	293	L4	11101927	110032005210	23103228	C	C	C	C	11049	442.3	349.9	4	3.17
CHYYZHZ	299	110032008039	2	2008-02-11	2008	14	34	2011-03-01	3	258	L4	11199095	110032004165	11196018	CG	CT	G	T	12378	428.7	389	3.46	3.14
NK3FCH	300	110038008030	2	2008-02-11	2008	7	34	2011-03-01	3	279	L4	11102909	110038004165	11196018	CG	CT	CG	CT	11363	364.4	344.3	3.21	3.03
NK3FCH	301	110038008031	2	2008-02-11	2008	7	34	2011-09-01	9	277	L4	11199095	110038003008	11196023	CG	CT	CG	CT	9455	311.7	283.3	3.3	3
CHY4D	302	110033008015	1	2008-02-12	2008	16	34	2010-05-15	5	304	L4	11197314	110033005048	7175748	CG	CT	G	T	11312	339.7	360.2	3	3.18
CHYYZHZ	303	110032008044	2	2008-02-15	2008	14	34	2011-03-29	3	230	L4	11199095	110032003205	11198748	CG	CT	G	T	8836	377.7	284.1	4.27	3.22
CHYYZHZ	304	110032008045	1	2008-02-15	2008	14	34	2010-02-20	2	295	L4	11101927	110032003147	11194127	C	C	C	C	8798	362.1	278.4	4.12	3.16
CHYYZHZ	305	110032008047	2	2008-02-17	2008	14	34	2011-07-11	7	304	L4	11101927	110032003179	11196018	CG	CT	CG	CT	9755	384.6	329.2	3.94	3.37
NK4FCH	306	110037008059	2	2008-02-17	2008	6	34	2011-10-23	10	317	L4	11199095	110037005053	11100260		CT	G	T	12717	380.1	384.9	2.99	3.03
NK3FCH	307	110038008040	2	2008-02-19	2008	7	34	2011-04-22	4	257	L4	11199095	110038201055	11194160	CG	CT	G	T	7502	235.3	224.9	3.14	3
NK3FCH	308	110038008041	2	2008-02-19	2008	7	34	2011-05-15	5	296	L4	11102909	110038003102	11196018	CG	CT	G	T	11532	468.8	386.3	4.07	3.35
YLDLZHCH	309	110071008088	1	2008-02-23	2008	3	34	2010-04-01	4	297	L4	11199095	110071004033	11199090	CG	CT	G	T	10454	427.8	319.5	4.09	3.06
CHY	310	110056008050	2	2008-02-24	2008	15	34					11197314	110056006019	11100260	C	C	G	T
NK3FCH	311	110038008045	2	2008-02-26	2008	7	34	2011-08-01	8	308	L4	11102909	110038005164	12103163	CG	CT	CG	CT	13562	532.1	444.2	3.92	3.28
CHY	312	110056008051	2	2008-02-27	2008	15	34					11100113	110056005025	13338971	CG	CT	CG	CT
YLDLZHCH	313	110071008097	2	2008-03-01	2008	3	31	2011-12-05	12	313	L4	11101930	110071004074	11199090	CG	CT	CG	CT	12130	339	369.2	2.79	3.04
YLDXW	314	110064008043	1	2008-03-03	2008	12	31	2010-03-31	3	292	L4	11199995	110064005259	31103411	C	C	CG	CT	9885	392.6	316	3.97	3.2
CHY4D	315	110033008029	2	2008-03-05	2008	16	31	2011-06-06	6	311	L4	11197314	110033006024	11196100	C	C	C	C	12492	454.7	414	3.64	3.31
DRW	316	110043008058	2	2008-03-05	2008	17	31	2011-08-22	8	300	L4	11100113	110043006006	11100113	C	C	CG	C	14001	564.9	484.7	4.03	3.46
CHY4D	317	110033008031	2	2008-03-06	2008	16	31	2011-08-29	8	287	L4	11197314	110033006015	13103025	C	C	CG	CT	8214	324.9	260.5	3.96	3.17
YLDXW	318	110064008047	2	2008-03-06	2008	12	31	2011-08-26	8	131	L3	11199995	110064004035	11196046	C	C	C	C	8975	345.3	276.7	3.85	3.08
NK3FCH	319	110038008050	2	2008-03-07	2008	7	31	2011-04-26	4	315	L4	11102909	110038003098	11196018	C	C	CG	CT	9894	336	323.5	3.4	3.27
DRW	320	110043008059	2	2008-03-08	2008	17	31	2011-09-18	9	273	L4	11102919	1100430Z6003	11198391	CG	CT	G	T	6199	177	201.8	2.85	3.26
CHYYZHZ	321	110032008066	2	2008-03-10	2008	14	31	2011-10-01	10	284	L4	11100113	110032005030	11101927	CG	CT	CG	CT	9544	350.9	310.7	3.68	3.26
YLDLZHCH	322	110071008114	1	2008-03-10	2008	3	31	2010-05-13	5	318	L4	11101930	110071005652		C	C	CG	C	12000	461.3	366	3.84	3.05
YLDLZHCH	323	110071008117	1	2008-03-12	2008	3	31	2010-05-11	5	320	L4	11100113	110071003224	11196015	C	C	G	T	10046	341.5	301.9	3.4	3.01
SANFA	324	110046008061	2	2008-03-13	2008	9	31	2011-08-08	8	254	L4	11102919	110046004092	11196100	CG	CT	CG	CT	11656	428.6	366.5	3.68	3.14
CHY	325	110031008059	2	2008-03-14	2008	15	31					11100113	1100310S0105	11196046	CG	CT	G	T
CHY	326	110056008061	2	2008-03-14	2008	15	31					11100113	110056003220	11199095	C	C	CG	CT
DRW	327	110043008064	1	2008-03-14	2008	17	31	2010-03-16	3	306	L4	11102919	1100430Z6001	11196035	C	C	G	T	9619	383.9	280.3	3.99	2.91
CHY4D	328	110033008035	1	2008-03-15	2008	16	31	2010-08-21	8	296	L4	11197314	110033004201	11102912	CG	CT	G	T	8380	330.7	274.4	3.95	3.27
CHY	329	110056008064	2	2008-03-18	2008	15	31					11197314	110056006046	11199095	CG	CT	CG	CT
CHY	330	110056008065	2	2008-03-18	2008	15	31					11100113	110031099089	11193550	C	C	CG	CT
CHY4D	331	110033008038	2	2008-03-21	2008	16	31	2011-03-16	3	89	L2	11197314	110033006013	11102396	CG	CT	CG	CT	6300	233.2	181.3	3.7	2.88
SANFA	332	110046008068	1	2008-03-22	2008	9	31	2010-04-01	4	290	L4	11102919	110046C97013	341252	C	C	CG	CT	11610	362.4	344.7	3.12	2.97
YLDXW	333	110064008055	2	2008-03-23	2008	12	31	2011-11-08	11	244	L4	11199995	110064001206	11194166	C	C	C	C	8415	327.2	291.7	3.89	3.47
YLDLZHCH	334	110071008131	2	2008-03-24	2008	3	31	2011-11-23	11	81	L2	11100113	110071005269	51102010	CG	CT	G	T	10489	397.3	306.6	3.79	2.92
YIZHUANG	335	110015008129	2	2008-03-24	2008	4	31	2011-06-07	6	294	L4	11101929	110015004837	18015268	CG	CT	G	T	11202	470.5	373.2	4.2	3.33
DRW	336	110043008067	2	2008-03-24	2008	17	31	2011-10-11	10	278	L4	11100113	110043006041	11102919	CG	CT	G	T	10276	324.8	337	3.16	3.28
YLDLZHCH	337	110071008132	2	2008-03-25	2008	3	31	2011-10-07	10	310	L4	11199095	110071004529	C0690009	C	C	CG	CT	8199	263.8	257.3	3.22	3.14
YLDXW	338	110064008056	1	2008-03-26	2008	12	31	2010-04-28	4	297	L4	11199995	110064005048	11197351	C	C	CG	C	9796	358.4	305.6	3.66	3.12
NK3FCH	339	110038008062	2	2008-03-27	2008	7	31	2011-05-29	5	312	L4	11199095	110038004206	11197351	C	C	G	T	10597	335.6	333.8	3.17	3.15
DRW	340	110043008069	2	2008-03-27	2008	17	31	2011-07-23	7	302	L4	11100113	110043005011	11196018	CG	CT	G	T	11405	427.7	370.9	3.75	3.25
CHY	341	110056008070	2	2008-03-30	2008	15	31					11102919	110056006049	11100260	C	C	CG	CT
NK3FCH	342	110038008066	2	2008-03-30	2008	7	31	2011-08-28	8	309	L4	11199095	110038004085	11196019	G	T	G	T				3.5	3.44
CHY4D	343	110033008044	2	2008-04-01	2008	16	31	2011-07-24	7	289	L4	11197314	110033005123	11199842	CG	CT	CG	CT	10289	397.4	323.2	3.86	3.14
CHY4D	344	110033008045	2	2008-04-01	2008	16	31	2011-04-23	4	235	L4	11197314	110033006029	23103229	C	C	C	C	8677	268.3	278	3.09	3.2
YIZHUANG	345	110015008138	1	2008-04-01	2008	4	31	2010-04-15	4	313	L4	11101929	110015005568	11197580	G	T	G	T	10438	352.1	326.9	3.37	3.13
NK4FCH	346	110037008106	2	2008-04-01	2008	6	31	2011-05-13	5	294	L4	11199095	110037004125	11196019	C	C	G	T	12790	365.1	388.1	2.85	3.03
DRW	347	110043008074	1	2008-04-03	2008	17	31	2010-03-12	3	282	L4	11100113	110043006020	11197580	C	C	C	C	11603	351.9	321.4	3.03	2.77
YLDXW	348	110064008060	1	2008-04-04	2008	12	31	2010-05-19	5	305	L4	11199995	110064006027	13103030	C	C	CG	CT	12707	462.5	383.9	3.64	3.02
NK3FCH	349	110038008071	2	2008-04-05	2008	7	31	2011-08-15	8	171	L3	11102909	110038003134	11196043	G		G	T	6570	236.6	232.5	3.6	3.54
YLDXW	350	110064008061	1	2008-04-05	2008	12	31	2010-06-24	6	298	L4	11199995	110064006012	31103419	CG	CT	CG	CT	10969	422.3	365.7	3.85	3.33
YLDXW	351	110064008062	2	2008-04-05	2008	12	31	2011-09-04	9	309	L4	11100113	110064000129	11194108	C	C	CG	CT				3.98	3.1
QUTOU	352	110044008337	1	2008-04-06	2008	8	31	2010-11-19	11	310	L4	11101929	110044004908	1150295	CG	CT	G	T	9676	340.6	316.1	3.52	3.27
BANHE	353	110045008079	2	2008-04-07	2008	1	31	2011-11-20	11	300	L4	11101906	110045005045	11197314	CG	CT	CG	CT	9394	312.9	299	3.33	3.18
DRW	354	110043008078	1	2008-04-07	2008	17	31	2010-03-29	3	293	L4	11199095	110043006053		C	C	C	C	9399	350.4	284.8	3.73	3.03
NK3FCH	355	110038008072	1	2008-04-08	2008	7	31	2010-05-05	5	307	L4	11102919	110038001164	11195016	CG	CT	CG	CT	11247	350.6	355.1	3.12	3.16
XINPU	356	110010208109	1	2008-04-08	2008	13	31	2010-06-21	6	292	L4	11101927	110010203370	11194108	CG	CT	G	T	12256	390.4	382.7	3.19	3.12
YIZHUANG	357	110015008147	2	2008-04-09	2008	4	31	2011-10-22	10	185	L3	11101929	110015005308	871856	CG	CT	G	T	10694	386.1	348.9	3.61	3.26
NK3FCH	358	110038008076	2	2008-04-09	2008	7	31	2011-06-08	6	302	L4	11199095	110038004185	11197314	CG	CT	CG	CT	12333	343.7	373.4	2.79	3.03
DRW	359	110043008079	2	2008-04-09	2008	17	31	2011-07-06	7	46	L2	11199095	110043006046	11199090		CT	CG	CT	9527	260	307.1	2.73	3.22
DRW	360	110043008081	2	2008-04-10	2008	17	31	2011-07-26	7	145	L3	11199095	110043006028	11102919	C	C	C	C	12241	427.4	390.9	3.49	3.19
CHY	361	110031608073	1	2008-04-11	2008	15	31	2010-03-22	3	295	L4	11102919	110056006059	11100113	C	C	C	C	7913	335.7	247.9	4.24	3.13
YLDLZHCH	362	110071008149	2	2008-04-11	2008	3	31	2011-07-28	7	290	L4	11100113	110071005388	A00012587	CG	CT	G	T	7387	306.2	249.4	4.14	3.38
YIZHUANG	363	110015008152	2	2008-04-14	2008	4	31	2011-05-01	5	296	L4	11101929	110015004315	1126782	CG	CT	G	T	11866	478	414	4.03	3.49
DRW	364	110043008085	2	2008-04-15	2008	17	31	2011-07-13	7	249	L4	11100113	110043001249	11194107	C	C	C	C	8472	359	272.9	4.24	3.22
DRW	365	110043008086	1	2008-04-15	2008	17	31	2010-08-29	8	231	L4	11100113	110043005057	11199090	C	C	C	C	10254	407.2	334.2	3.97	3.26
NJTH	366	110017A08152	1	2008-04-15	2008	5	31	2010-05-21	5	304	L4	11199095	110071003202	11100120	C	C	CG	CT	10290	464.2	331.1	4.51	3.22
CHY	367	110056008075	2	2008-04-17	2008	15	31					11102912	110056005267	11100260	C	C	CG	CT
DRW	368	110043008087	2	2008-04-17	2008	17	31	2011-07-01	7	261	L4	11199095	110043005276	11100113	C	C	CG	C	5380	212.4	205.1	3.95	3.81
CHY	369	110056008077	2	2008-04-18	2008	15	31					11102912	110056003207	11196273	C	C	G	T
YIZHUANG	370	110015008155	2	2008-04-18	2008	4	31	2011-09-27	9	301	L4	11101929	110015004426	1076524	CG	CT	CG	CT	6223	254	202.4	4.08	3.25
NK3FCH	371	110038008078	2	2008-04-18	2008	7	31	2011-06-02	6	308	L4	11100113	110038005035	11196018	C	C	G	T	9348	347.6	314	3.72	3.36
CHYYZHZ	372	110032008091	1	2008-04-19	2008	14	31	2010-11-18	11	299	L4	11101902	110032002215	11196044	G	T	G	T	10175	333.6	291.9	3.28	2.87
YLDCHCH	373	110055008027	2	2008-04-20	2008	2	31	2011-12-16	12	281	L4	11199095	110055006061	11194165	C	C	G		4976	54.1	46.9	1.09	0.94
CHY	374	110031608078	2	2008-04-20	2008	15	31	2011-06-23	6	321	L4	11101929	110056004268	11196035	CG	CT	CG	CT	11510	412.8	354.9	3.59	3.08
YLDXW	375	110064008070	2	2008-04-20	2008	12	31	2011-12-06	12	277	L4	11100113	110064003128	11196044	C	C	G	T	12333	393	353.4	3.19	2.87
BANHE	376	110045008080	2	2008-04-21	2008	1	31	2011-10-05	10	319	L4	11101906	110045005237	11197314	CG	CT	CG	CT	6001	164.1	193.9	2.74	3.23
YIZHUANG	377	110015008162	2	2008-04-23	2008	4	31	2011-07-30	7	304	L4	11101929	110015005369	1033515	CG	CT	G	T	14823	455.6	464.6	3.07	3.13
BJ5D	378	110026008067	1	2008-04-23	2008	10	31					11102912	110026005201	12103164	CG	CT	CG	CT
CHYYZHZ	379	110032008094	2	2008-04-24	2008	14	31	2011-09-06	9	309	L4	11102129	110032006094	11196035	CG	CT	CG	CT				2.7	3.35
DRW	380	110043008091	1	2008-04-26	2008	17	31	2010-07-05	7	321	L4	11199095	110043005085	11194166	C	C	C	C	11248	368.1	337.8	3.27	3
DRW	381	110043008092	2	2008-04-26	2008	17	31	2011-07-29	7	86	L2	11199095	110043005044	11199090	CG	CT	G	T	5112	202.8	139.1	3.97	2.72
YIZHUANG	382	110015008172	2	2008-04-28	2008	4	31	2011-06-03	6	298	L4	11101929	110015005576	11197580	G	T	G	T	12895	453.7	413.9	3.52	3.21
NK3FCH	383	110038008083	2	2008-04-28	2008	7	31	2011-09-17	9	261	L4	11102919	110038003080	11198378	C	C	CG	CT	13322	456.9	426.9	3.43	3.2
NK3FCH	384	110038008084	1	2008-04-28	2008	7	31	2010-08-01	8	310	L4	11102909	110038005052	11100260	C	C	C	C	14221	400.7	432.6	2.82	3.04
XINPU	385	110010208123	2	2008-04-28	2008	13	31	2011-11-02	11	307	L4	11101927	110010201330	11193546	CG	CT	G	T	11271	302.7	334.2	2.69	2.97
YIZHUANG	386	110015008174	2	2008-04-29	2008	4	31	2011-06-12	6	254	L4	11101929	110015004416	41037501	G	T	G	T	9410	423.9	315.6	4.5	3.35
YIZHUANG	387	110015008177	2	2008-04-29	2008	4	31	2011-06-20	6	309	L4	11101929	110015005574	11197580	CG	CT	CG	CT	9379	370.4	285.2	3.95	3.04
YLDCHCH	388	110055008034	2	2008-05-01	2008	2	31	2011-11-04	11	261	L4	11100113	110055005021	11196050				CT	11325	317.9	349.7	2.81	3.09
CHY	389	110056008081	1	2008-05-01	2008	15	31					11102919	110056006065	11100113	C	C	C	C
CHY	390	110031608082	2	2008-05-01	2008	15	31	2011-06-13	6	302	L4	11102919	110056006075	11100113	CG	CT	G	T	11355	337.7	338.5	2.97	2.98
BANHE	391	110045008083	1	2008-05-02	2008	1	31	2010-08-09	8	314	L4	11101906	110045005250	11197314	C	C	C	C	11898	428.1	400.3	3.6	3.36
YLDLZHCH	392	110071008168	2	2008-05-02	2008	3	31	2011-07-30	7	316	L4	11100113	110071003241	11196015	C	C	G	T	8974	297.3	259.3	3.31	2.89
NK3FCH	393	110038008087	1	2008-05-05	2008	7	31	2010-06-06	6	305	L4	11100113	110038004200	11196018	C	C	CG	CT	10402	274.2	315.2	2.64	3.03
SANFA	394	110046008082	2	2008-05-07	2008	9	31	2011-06-29	6	294	L4	11100113	110046006020	11102919	CG	CT	G	T	12445	404.9	385.5	3.25	3.1
SANFA	395	110046008083	2	2008-05-09	2008	9	31	2011-06-13	6	310	L4	11100113	110046005231	11196100	CG	CT	G	T	11393	399.4	350.5	3.51	3.08
DRW	396	110043008099	2	2008-05-09	2008	17	31	2011-08-29	8	293	L4	11100113	110043005055	12102126	C	C	CG	C	13659	503.6	410	3.69	3
YLDXW	397	110064008082	1	2008-05-10	2008	12	31	2010-08-09	8	313	L4	11199995	110064004238	11197351	C	C	CG	CT	11915	470.8	371.4	3.95	3.12
BJ5D	398	110026008078	2	2008-05-13	2008	10	31					11102912	110026006020	11102008	CG	CT	G	T
YLDLZHCH	399	110071008169	1	2008-05-15	2008	3	31	2010-05-20	5	311	L4	11199095	110071001287	11194108	CG	CT	G	T	10224	299.5	295.3	2.93	2.89
YIZHUANG	400	110015008195	2	2008-05-17	2008	4	31	2011-06-24	6	305	L4	11101929	110015004454	915684	CG	CT	CG	CT	7264	282.1	234.1	3.88	3.22
XINPU	401	110010208146	1	2008-05-17	2008	13	31	2010-06-12	6	301	L4	11101927	110010203174	11199842	G	T	G	T	10144	444.5	327.6	4.38	3.23
BJ5D	402	110023008079	1	2008-05-18	2008	10	31					11102912	110026006074	11102909	C	C	G	T
CHYYZHZ	403	110032008115	2	2008-05-19	2008	14	31	2011-10-07	10	278	L4	11101927	110032003164	11194107	C	C	CG	CT	5621	200.5	180.5	3.57	3.21
YIZHUANG	404	110015008204	2	2008-05-20	2008	4	31	2011-06-11	6	318	L4	11101929	110015004847	1056527	CG	CT	G	T	12110	457.1	381.7	3.77	3.15
CHYYZHZ	405	110032008117	1	2008-05-21	2008	14	31	2010-06-15	6	301	L4	11101907	110032006008	12103149	C	C	CG	CT	8448	294	279	3.48	3.3
YIZHUANG	406	110015008206	2	2008-05-22	2008	4	31	2011-08-21	8	282	L4	11101929	110015004364	869155	CG	CT	G	T	9888	385.9	327.7	3.9	3.31
YIZHUANG	407	110015008211	2	2008-05-25	2008	4	31	2011-05-25	5	307	L4	11101929	110015005366	871856	CG	CT	G	T	13994	544.5	443	3.89	3.17
NK3FCH	408	110038008100	2	2008-05-26	2008	7	31	2011-09-19	9	287	L4	11199095	110038005039	11197351	C	C	G	T	12806	449.3	428.2	3.51	3.34
CHYYZHZ	409	110032008120	2	2008-05-27	2008	14	31	2011-08-04	8	280	L4	11197314	110032002159	11199815	CG	CT	CG	CT	8838	267.4	284.3	3.03	3.22
CHYYZHZ	410	110032008121	1	2008-05-29	2008	14	31	2010-05-26	5	293	L4	11100113	110032002100	11199815	CG	CT	G	T	10352	323.8	310	3.13	2.99
YLDCHCH	411	110055008046	2	2008-05-30	2008	2	31	2011-08-08	8	292	L4	11100113	110055004007	11100113	CG	CT	CG	CT	13241	379.2	440.4	2.86	3.33
YIZHUANG	412	110015008216	2	2008-05-30	2008	4	31	2011-09-10	9	291	L4	11101902	110015004631	7175748	CG	CT	G	T	12351	464.2	387.3	3.76	3.14
CHYYZHZ	413	110032008123	2	2008-06-01	2008	14	32	2011-06-03	6	314	L4	11101907	110032006074	11196035	CG	CT	CG	CT	14665	495.7	430	3.38	2.93
NK4FCH	414	110037008147	2	2008-06-01	2008	6	32	2011-07-05	7	304	L4	11199095	110037003283	11194108	C	C	G	T	11673	336.3	370.8	2.88	3.18
YLDXW	415	110064008093	2	2008-06-01	2008	12	32	2011-10-21	10	297	L4	11199995	110064004119	11101914	CG	CT	CG	CT	4513	189.3	158.9	4.19	3.52
YIZHUANG	416	110015008227	2	2008-06-02	2008	4	32	2011-06-11	6	255	L4	11101929	110015005564	11197580	C	C	CG	CT	10868	383.2	361.5	3.53	3.33
XINPU	417	110010208164	2	2008-06-02	2008	13	32	2011-05-16	5	208	L4	11101927	110010206028	61203011	G	T	G	T	4792	216.1	183	4.51	3.82
XINPU	418	110010208165	1	2008-06-02	2008	13	32	2010-06-20	6	293	L4	11101927	110010020608	11193546	CG	CT	CG	CT	11004	387.2	349.8	3.52	3.18
XJ1D	419	110001108094	2	2008-06-04	2008	11	32	2011-09-28	9	315	L4	11103543	110001023361	11199842	C	C	G	CT	11247	410.4	349.6	3.65	3.11
CHYYZHZ	420	110032008125	2	2008-06-05	2008	14	32	2011-08-06	8	312	L4	11101907	110032006060	11197314	C	C	CG	C	12287	428.9	362.9	3.49	2.95
NK3FCH	421	110038008108	2	2008-06-05	2008	7	32	2011-07-28	7	312	L4	11100113	110038003016	11196023	C	C	CG	C	12301	439.2	410.8	3.57	3.34
QUTOU	422	110044008347	2	2008-06-05	2008	8	32	2011-11-19	11	36	L2	11101902	110044005357	3068	G	T	G	T	2635	100.1	81.7	3.8	3.1
YLDXW	423	110064008097	2	2008-06-05	2008	12	32	2011-08-31	8	284	L4	11199995	110064005094	11197351	C	C	C	C	6628	261.3	212.4	3.94	3.2
XINPU	424	110010208169	1	2008-06-05	2008	13	32	2010-08-17	8	297	L4	11101927	110010020736		C	C	C	C	9127	349.3	313.1	3.83	3.43
YLDXW	425	110064008099	1	2008-06-07	2008	12	32	2010-08-04	8	318	L4	11199995	110064004025	11196046	CG	CT	CG	CT	9966	354.2	340.3	3.55	3.41
YLDXW	426	110064008100	2	2008-06-07	2008	12	32	2011-11-22	11	265	L4	11199095	110064005028	11197351	C	C	G	CT	12338	391.6	371.7	3.17	3.01
XINPU	427	110010208173	2	2008-06-07	2008	13	32	2011-07-13	7	269	L4	11101927	110010201198	11193553	C	C	C	C	9292	289.8	297.2	3.12	3.2
YIZHUANG	428	110015008240	2	2008-06-09	2008	4	32	2011-05-24	5	308	L4	11101929	110015005479	810146	CG	CT	G	T	12460	365.1	410.1	2.93	3.29
XINPU	429	110010208174	2	2008-06-09	2008	13	32	2011-09-27	9	312	L4	11101927	110010204138	11199842	C	C	CG	CT	8647	360.2	294.7	4.17	3.41
BJ5D	430	110023008090	1	2008-06-09	2008	10	32					11101906	110026005036	11199069	CG	CT	CG	CT
NK3FCH	431	110038008115	2	2008-06-11	2008	7	32	2011-08-17	8	292	L4	11100113	110038003025	11198391	CG	CT	G	T	11750	376.8	346.3	3.21	2.95
NK3FCH	432	110038008117	2	2008-06-11	2008	7	32	2011-06-25	6	255	L4	11100113	110038005017	11196018	CG	CT	CG	CT	10827	340.9	318.6	3.15	2.94
NK4FCH	433	110037008163	2	2008-06-14	2008	6	32	2011-08-23	8	223	L4	11199095	110037001193	11196046	C	C	CG	CT	10898	336.4	343	3.09	3.15
YLDXW	434	110064008105	1	2008-06-14	2008	12	32	2010-04-21	4	333	L4	11199095	110064002136	11199995	CG	CT	CG	CT	10337	387.2	327.1	3.75	3.16
YIZHUANG	435	110015008259	2	2008-06-16	2008	4	32	2011-07-30	7	304	L4	11101929	110015004831	1056527	G	T	G	T	12172	462.4	398.7	3.8	3.28
YIZHUANG	436	110015008260	2	2008-06-16	2008	4	32	2011-07-22	7	277	L4	11101929	110015005580	11194115	G	T	G	T	9110	395.8	302.9	4.34	3.32
NK3FCH	437	110038008121	2	2008-06-16	2008	7	32	2011-07-10	7	302	L4	11199095	110038003017	11197314	G	T	G	T	12613	373.1	388.6	2.96	3.08
NK3FCH	438	110038008122	2	2008-06-16	2008	7	32	2011-11-02	11	306	L4	11199095	110038004204	11100260	CG	CT	G	T	12455	411	383.5	3.3	3.08
QUTOU	439	110044008117	1	2008-06-16	2008	8	32	2010-11-10	11	319	L4	11101906	110044004264	11196273	CG	CT	G	T	11008	388.9	345.7	3.53	3.14
XINPU	440	110010208179	1	2008-06-16	2008	13	32	2010-09-25	9	315	L4	11101927	110010205060	13102315	G	T	G	T	9351	313.2	295.3	3.35	3.16
YIZHUANG	441	110015008265	2	2008-06-17	2008	4	32	2011-05-16	5	43	L2	11101907	110015005375	1210762	CG	CT	CG	CT	11446	423.5	366.3	3.7	3.2
YIZHUANG	442	110015008269	2	2008-06-18	2008	4	32	2011-10-22	10	311	L4	11101929	110015005803	133187971	CG	CT	CG	CT	13266	435.5	435	3.28	3.28
CHY4D	443	110033008083	2	2008-06-19	2008	16	32	2011-11-27	11	288	L4	11197314	110056004145	11196044	CG	CT	G	T	11631	376.3	334.2	3.24	2.87
CHYYZHZ	444	110032008131	1	2008-06-20	2008	14	32	2010-05-24	5	295	L4	11101907	110032006043	11100519	C	C	CG	CT	11467	422.4	365.7	3.68	3.19
NK3FCH	445	110038008125	2	2008-06-20	2008	7	32	2011-07-01	7	279	L4	11100113	110038004156	11197314	C	C	CG	C	10344	340.2	320.8	3.29	3.1
NK4FCH	446	110037008166	2	2008-06-21	2008	6	32	2011-10-17	10	290	L4	11199095	110037004039	7175748	C	C	CG	CT	3055	96	104.2	3.14	3.41
YIZHUANG	447	110015008280	2	2008-06-23	2008	4	32	2011-06-25	6	276	L4	11101907	110015004919	1073618		CT	G	T	12553	464.3	396.2	3.7	3.16
NK3FCH	448	110038008128	2	2008-06-23	2008	7	32	2011-07-12	7	300	L4	11199095	110038003186	11196044	G	T	G	T	8197	282.6	271	3.45	3.31
YLDLZHCH	449	110071008201	2	2008-06-23	2008	3	32	2011-08-28	8	259	L4	11100113	110071005072	11194166	C	C	G		6854	187	220.2	2.73	3.21
CHY	450	110056008112	1	2008-06-24	2008	15	32					11101906	110056004070	11197314	C	C	CG	CT
SANFA	451	110046008104	2	2008-06-24	2008	9	32	2011-08-01	8	292	L4	11100113	110046006079	11101907	CG	CT	G	T	11785	359.2	346.9	3.05	2.94
YLDXW	452	110064008112	1	2008-06-24	2008	12	32	2010-08-01	8	294	L4	11199095	110064005105	11197351		C	G		10981	397.3	340.5	3.62	3.1
CHYYZHZ	453	110032008137	2	2008-06-25	2008	14	32	2011-08-06	8	312	L4	11101927	110032006099	11197314	CG	CT	CG	CT	11510	411.1	392.4	3.57	3.41
YIZHUANG	454	110015008285	2	2008-06-27	2008	4	32	2011-09-12	9	260	L4	11101907	110015004335	5319769	CG	CT	CG	CT	12699	462.1	412.2	3.64	3.25
NK3FCH	455	110038008131	1	2008-06-27	2008	7	32	2010-09-10	9	298	L4	11100113	110038004142	11196018	C	C	G	T	10504	252.2	320.7	2.4	3.05
CHYYZHZ	456	110032008139	2	2008-06-28	2008	14	32	2011-11-14	11	268	L4	11199095	110032005101	11102919	C	C	CG	CT	12788	494.7	435.1	3.87	3.4
DRW	457	110043008131	2	2008-06-28	2008	17	32	2011-07-01	7	289	L4	11100113	110043006074	11197580	CG	CT	G	T	9487	307.1	310.1	3.24	3.27
YLDLZHCH	458	110071008213	2	2008-06-29	2008	3	32	2011-07-10	7	273	L4	11100113	110071001137	31195510	C	C	CG		12652	438.7	384.2	3.47	3.04
BANHE	459	110045008107	2	2008-07-01	2008	1	32	2011-09-25	9	294	L4	11102919	110045004015	11196018	CG	CT	CG	CT	4621	143.5	167	3.1	3.61
NK3FCH	460	110038008133	2	2008-07-01	2008	7	32	2011-07-13	7	267	L4	11100113	110038005057	11196018	C	C	CG	CT	11572	340.9	361.8	2.95	3.13
QUTOU	461	110044008385	1	2008-07-01	2008	8	32	2010-11-09	11	292	L4	11199095	110044002144	11194166	CG	CT	CG		11026	376.5	331.7	3.41	3.01
SANFA	462	110046008108	2	2008-07-01	2008	9	32	2011-08-20	8	242	L4	11100113	110046004184	11196100	C	C	CG	CT	11842	325.2	358.5	2.75	3.03
CHYYZHZ	463	110032008140	2	2008-07-02	2008	14	32	2011-06-25	6	292	L4	11101907	110032005036	61202004	C	C	CG	C	13879	454.6	418.3	3.28	3.01
YIZHUANG	464	110015008297	2	2008-07-02	2008	4	32	2011-12-07	12	20	L1	11101907	110015005460	1197781	C	C	C	C	4758	226.1	202.3	4.75	4.25
BJ5D	465	110026008113	2	2008-07-02	2008	10	32					11102912	110026004266	11100113	C	C	G
YIZHUANG	466	110015008306	2	2008-07-04	2008	4	32	2011-08-16	8	316	L4	11101907	110015004910	75682	C	C	CG	CT	11334	506.1	374.9	4.47	3.31
NK4FCH	467	110037008180	2	2008-07-05	2008	6	32	2011-06-19	6	257	L4	11199095	110037005164	11101927	CG	CT	CG	CT	9955	353.5	318	3.55	3.19
YLDXW	468	110064008121	2	2008-07-05	2008	12	32	2011-09-21	9	263	L4	11199995	110064003055	36151968	CG	CT	G	T	10838	401.1	358.9	3.7	3.31
DRW	469	110043008134	1	2008-07-05	2008	17	32	2010-06-15	6	306	L4	11100113	110043005083	11194166	CG	CT	G	T	11446	398.4	348.2	3.48	3.04
SANFA	470	110046008111	1	2008-07-07	2008	9	32	2010-08-20	8	302	L4	11100113	110046001216	11196018	C	C	G		8559	263.6	262.8	3.08	3.07
YLDXW	471	110064008124	1	2008-07-08	2008	12	32	2010-10-07	10	317	L4	11199995	110064005246	11197351	C	C	CG	CT	11205	440.7	352.7	3.93	3.15
BANHE	472	110045008113	2	2008-07-10	2008	1	32	2011-10-25	10	299	L4	11102919	110045006081	11197314	CG	CT	CG	CT	12440	346.3	374.4	2.78	3.01
BANHE	473	110045008116	2	2008-07-15	2008	1	32	2011-12-10	12	316	L4	11102919	110045006070	11197314	CG	CT	CG	CT	13054	313.6	429.1	2.4	3.29
BANHE	474	110045008118	2	2008-07-19	2008	1	32	2011-06-08	6	312	L4	11102919	110045006106	11196035	C	C	C	C	12533	333.5	384.6	2.66	3.07
SANFA	475	110046008117	2	2008-07-19	2008	9	32	2011-08-30	8	292	L4	11100113	110046004218	11196100	C	C	CG	CT	8922	331.8	289	3.72	3.24
YLDCHCH	476	110055008073	2	2008-07-22	2008	2	32	2011-07-13	7	318	L4	11100113	110055003219	11100113	G	T	G	T	12035	385.8	382.4	3.21	3.18
YLDLZHCH	477	110071008274	2	2008-07-25	2008	3	32	2011-08-03	8	221	L4	11100113	110071005393	A00012801	C	C	CG	CT	5841	269	197	4.61	3.37
QUTOU	478	110044008361	1	2008-07-29	2008	8	32	2010-11-20	11	309	L4	11101902	110044005402	1217794	CG	CT	G	T	10724	409.3	330.5	3.82	3.08
CHY	479	110056008144	2	2008-07-30	2008	15	32					11101902	110056005056	11101914	C	C	C	C
YIZHUANG	480	110015008379	2	2008-07-30	2008	4	32	2011-10-05	10	293	L4	11101929	110015005467	10573621	G	T	G	T	12114	354.4	372.1	2.93	3.07
YLDXW	481	110064008138	2	2008-07-30	2008	12	32	2011-11-28	11	103	L2	11199995	110064006003	11197351	C	C	CG	C	8310	288.5	269.2	3.47	3.24
YLDCHCH	482	110055008082	2	2008-07-31	2008	2	32	2011-09-27	9	299	L4	11101929	110055006147	11101929	CG	CT	CG	CT	10029	285.2	345.9	2.84	3.45
NK3FCH	483	110038008167	2	2008-08-01	2008	7	32	2011-08-04	8	305	L4	11103543	110038097021	11193541	C	C	G	T	10393	303.1	324	2.92	3.12
NJTH	484	110017A08293	1	2008-08-01	2008	5	32	2010-11-19	11	303	L4	11101916	110071003101	11196018	C	C	C	C	10269	430.5	304.8	4.19	2.97
YLDCHCH	485	110055008086	2	2008-08-02	2008	2	32	2011-09-19	9	307	L4	11100113	110055003168	11100113	CG	CT	G	T				3.01	3.54
YIZHUANG	486	110015008394	2	2008-08-03	2008	4	32	2011-07-03	7	296	L4	11101929	110015004397	236230732	CG	CT	CG	CT	11962	505.3	405.1	4.22	3.39
NK3FCH	487	110038008170	2	2008-08-03	2008	7	32	2011-07-03	7	309	L4	11102919	110038005072	11197351	G	T	G	T	10222	336.7	352.3	3.29	3.45
YLDXW	488	110064008142	1	2008-08-03	2008	12	32	2010-08-14	8	308	L4	11199995	110064005053	11197351	CG	CT	CG	CT	11109	436.9	361.2	3.93	3.25
CHY4D	489	110033008117	1	2008-08-04	2008	16	32	2010-09-06	9	310	L4	11100113	110033005001	11102719	C	C	G		9111	276.5	283.1	3.03	3.11
YLDXW	490	110064008145	2	2008-08-04	2008	12	32	2011-10-22	10	296	L4	11199995	110064005084	11197351	C	C	C	C	13241	408.5	391.7	3.09	2.96
XINPU	491	110010208224	2	2008-08-04	2008	13	32	2011-09-01	9	278	L4	11101927	110010205118	11197361	CG	CT	CG	CT	9862	337.6	322.2	3.42	3.27
NK3FCH	492	110038008171	2	2008-08-05	2008	7	32	2011-10-12	10	294	L4	11102919	110038006066	11199095	C	C	C	C	11352	316.8	349.5	2.79	3.08
BANHE	493	110045008129	2	2008-08-06	2008	1	32	2011-07-15	7	275	L4	11102919	110045003228	11196018	CG	CT	G	T	8927	240	282.1	2.69	3.16
YIZHUANG	494	110015008412	1	2008-08-06	2008	4	32	2011-05-06	5	291	L4	11101902	110015005411	646491	CG	CT	CG	CT	12366	507	394.8	4.1	3.19
YIZHUANG	495	110015008414	2	2008-08-06	2008	4	32	2011-10-30	10	303	L4	11101929	110015005434	7125362	CG	CT	G	T	9994	352.2	335.8	3.52	3.36
NK3FCH	496	110038008172	1	2008-08-06	2008	7	32	2010-10-03	10	303	L4	11199095	110038002116	11196046	C	C	CG	CT	12003	360.8	362.9	3.01	3.02
YLDXW	497	110064008150	2	2008-08-06	2008	12	32	2011-11-02	11	285	L4	11199095	110064001136	11194166	C	C	CG	CT	6605	215.1	216	3.26	3.27
CHY4D	498	110033008121	2	2008-08-08	2008	16	32	2011-11-24	11	228	L4	11100113	110033006101	11100519	C	C	G		8809	193.9	264.1	2.2	3
YIZHUANG	499	110015008421	2	2008-08-08	2008	4	32	2011-09-16	9	285	L4	11102909	110015095140	11196015	CG	CT	G	T	11661	454.6	382.9	3.9	3.28
QUTOU	500	110044008366	2	2008-08-08	2008	8	32	2011-09-02	9	268	L4	11101902	110044008490	11193553	G	T	G	T	12216	389.4	371.8	3.19	3.04
YLDXW	501	110064008155	2	2008-08-08	2008	12	32	2011-08-01	8	50	L2	11102919	110064002094	23199202	G	T	G	T	959	51.2	38.1	5.34	3.97
YIZHUANG	502	110015008424	1	2008-08-09	2008	4	32	2010-08-07	8	292	L4	11102909	110015003577	11197310	CG		CG	CT	9724	403.2	326.2	4.15	3.35
QUTOU	503	110044008267	1	2008-08-09	2008	8	32	2010-11-02	11	299	L4	11101902	110044000052	11194160	G	T	G	T	10601	370.7	309.6	3.5	2.92
XINPU	504	110010208229	1	2008-08-09	2008	13	32	2010-09-08	9	305	L4	11101927	110010204112	11198391	C	C	C	C	10615	497.6	335.3	4.69	3.16
BANHE	505	110045008132	2	2008-08-10	2008	1	32	2011-07-13	7	277	L4	11102919	110045002037	F119903	C	C	CG	C	8706	258.5	264.3	2.97	3.04
YLDXW	506	110064008158	1	2008-08-10	2008	12	32	2010-08-26	8	296	L4	11199995	110064006075	11197314	C	C	CG	CT	10347	376.5	327.2	3.64	3.16
BANHE	507	110045008134	2	2008-08-11	2008	1	32	2011-08-01	8	293	L4	11102919	110045004073	11196100	CG	CT	G	T	10436	326.6	356.6	3.13	3.42
YIZHUANG	508	110015008432	2	2008-08-11	2008	4	32	2011-10-12	10	321	L4	11102909	110015004726	11196019	CG	CT	CG	CT	10623	396.7	343.3	3.73	3.23
YIZHUANG	509	110015008437	1	2008-08-12	2008	4	32	2010-11-06	11	290	L4	11101929	110015005628	11199095	CG	CT	CG	CT	7708	277.5	254.7	3.6	3.3
YIZHUANG	510	110015008439	1	2008-08-12	2008	4	32	2010-12-08	12	293	L4	11102129	110015003457	803002241	CG	CT	CG	CT	9264	382.2	326.8	4.13	3.53
DRW	511	110043008181	1	2008-08-12	2008	17	32	2010-08-04	8	319	L4	11100113	110043005137	11196018	CG	CT	G	T	7757	308.8	241.8	3.98	3.12
NJTH	512	110017A08316	1	2008-08-12	2008	5	32	2010-08-23	8	302	L4	11101916	110071005546	1225495	CG	CT	CG	CT	10974	531.1	345.6	4.84	3.15
NJTH	513	110017A08318	1	2008-08-12	2008	5	32	2010-10-19	10	334	L4	11101916	110071002069	11194127	CG	CT	CG	CT	10404	405.1	320.3	3.89	3.08
YLDLZHCH	514	110071008319	2	2008-08-12	2008	3	32	2011-08-04	8	248	L4	11100113	110071004404	907214	CG	CT	G	T	10529	297.5	338.4	2.83	3.21
YLDLZHCH	515	110071008320	2	2008-08-12	2008	3	32	2011-08-08	8	307	L4	11100113	110071004404	907214	C	C	CG	C	7550	294	249.1	3.89	3.3
XINPU	516	110010208239	2	2008-08-13	2008	13	32	2011-09-26	9	313	L4	11101927	110010204012	11199842	C	C	C	C	7436	286.1	252.4	3.85	3.39
YLDLZHCH	517	110071008329	1	2008-08-15	2008	3	32	2010-09-08	9	319	L4	11100113	110071004461	701900146		CT	G	T	12399	472.2	379.9	3.81	3.06
NK3FCH	518	110038008177	2	2008-08-15	2008	7	32	2011-08-07	8	242	L4	11103543	110038006077	11199095	C	C	G	T	7470	255.2	245.4	3.42	3.29
NK3FCH	519	110038008178	1	2008-08-15	2008	7	32	2010-12-01	12	314	L4	11199095	110038003270	11100113	CG	CT	G	T	11429	357.8	359.7	3.13	3.15
XINPU	520	110010208227	2	2008-08-15	2008	13	32	2011-09-06	9	301	L4	11101927	110010204014	11199842	CG		G		7241	302.2	240.3	4.17	3.32
NJTH	521	110017A08328	1	2008-08-15	2008	5	32	2010-10-05	10	313	L4	11101916	110071003083	11194166	CG	CT	G	T	10648	430.5	332.8	4.04	3.13
BANHE	522	110045008141	2	2008-08-16	2008	1	32	2011-09-01	9	137	L3	11102919	110045005074	11197314	G	T	G	T	6893	254.2	217.9	3.69	3.16
BANHE	523	110045008142	2	2008-08-16	2008	1	32	2011-08-20	8	302	L4	11102919	110045005050	11197314	C	C	CG	CT	10632	296.7	328.3	2.79	3.09
YIZHUANG	524	110015008456	2	2008-08-16	2008	4	32	2011-08-18	8	131	L3	11101929	110015005843	17064727	CG	CT	G	T	8718	331.9	306.9	3.81	3.52
YLDLZHCH	525	110071008331	2	2008-08-16	2008	3	32	2011-09-09	9	303	L4	11100113	110071005578	1167491	C	C	CG	CT	4846	170.3	158.7	3.51	3.27
YLDXW	526	110064008166	1	2008-08-17	2008	12	32	2010-08-05	8	317	L4	11199095	110064003145	11196044	G	T	G	T	10980	409.2	342	3.73	3.11
YLDCHCH	527	110055008102	2	2008-08-17	2008	2	32	2011-10-22	10	308	L4	11199095	110055003040	11194165	CG	CT	CG	CT	11576	418.3	375.1	3.61	3.24
NK3FCH	528	110038008181	2	2008-08-18	2008	7	32	2011-11-04	11	304	L4	11100113	110038004146	11197351	C	C			11072	331.7	346.2	3	3.13
YLDXW	529	110064008168	2	2008-08-18	2008	12	32	2011-08-26	8	289	L4	11102919	110064003094	11194161	CG	CT	G	T	9871	350.9	329.2	3.55	3.34
DRW	530	110043008139	1	2008-08-18	2008	17	32	2010-06-19	6	302	L4	11100113	110043003130	11194108	CG	CT	G	T	6097	217.9	196.8	3.57	3.23
YLDLZHCH	531	110071008342	2	2008-08-19	2008	3	32	2011-10-15	10	267	L4	11199095	110071099193	11194107	CG	CT	G	T	11555	422.9	379.8	3.66	3.29
YIZHUANG	532	110015008461	2	2008-08-19	2008	4	32	2011-09-21	9	251	L4	11101929	110015004898	1063690	CG	CT	G	T	4794	184.2	162.4	3.84	3.39
YLDLZHCH	533	110071008344	2	2008-08-20	2008	3	32	2011-07-01	7	317	L4	11199095	110071004297	11194165	CG	CT	CG	CT	7420	301.8	255.1	4.07	3.44
CHY4D	534	110033008141	2	2008-08-21	2008	16	32	2011-09-28	9	313	L4	11100113	110033005087	11198748	C	C	G		12056	413.3	380.5	3.43	3.16
DRW	535	110043008191	1	2008-08-21	2008	17	32	2010-10-13	10	312	L4	11100113	110043003074	11196018	C	C	CG	C	13114	429.3	393	3.27	3
DRW	536	110043008196	2	2008-08-22	2008	17	32	2011-08-06	8	316	L4	11100113	110043005158	11196035	CG	CT	G	T	13062	463.3	406.2	3.55	3.11
YLDLZHCH	537	110071008356	1	2008-08-23	2008	3	32	2010-08-31	8	299	L4	11101916	110071005568	H01199445	C	C	CG	CT	12732	546.8	389.4	4.29	3.06
YLDLZHCH	538	110071008357	1	2008-08-23	2008	3	32	2010-10-07	10	290	L4	11199095	110071004499	A00014190	CG	CT	G	T	10166	394.8	300.7	3.88	2.96
NK3FCH	539	110038008186	2	2008-08-23	2008	7	32	2011-08-28	8	309	L4	11199095	110038002114	11194107	G	T	G	T				3.46	3.37
BANHE	540	110045008155	2	2008-08-26	2008	1	32	2011-07-24	7	301	L4	11102919	110045004132	11196018	C	C	C	C	12918	344	381.5	2.66	2.95
BANHE	541	110045008156	2	2008-08-26	2008	1	32	2011-11-06	11	287	L4	11102919	110045002090	11196044	CG	CT	CG	T	11468	258.7	348.6	2.26	3.04
CHY	542	110056008174	1	2008-08-26	2008	15	32					11101927	110056005100	11101902	CG	CT	CG	CT
YLDLZHCH	543	110071008365	2	2008-08-26	2008	3	32	2011-10-14	10	303	L4	11199095	110071004185	11196035	CG	CT	CG	CT	11658	432.8	363.3	3.71	3.12
YIZHUANG	544	110015008475	2	2008-08-27	2008	4	32	2011-12-01	12	298	L4	11102129	110015005472	1169444	C	C	G		11642	419.7	357.2	3.6	3.07
SANFA	545	110046008158	1	2008-08-28	2008	9	32	2010-09-25	9	295	L4	11100113	110046006051	11101907	CG	CT	CG	CT	10606	418.5	330.2	3.95	3.11
BANHE	546	110045008157	1	2008-08-29	2008	1	32	2010-09-17	9	304	L4	11102919	110045005026	11102910	CG	CT	CG	CT	10690	382.5	336.4	3.58	3.15
YLDLZHCH	547	110071008374	2	2008-08-29	2008	3	32	2011-09-17	9	267	L4	11199095	110071005406	H00970602	CG	CT	CG	CT	9337	423.9	305.3	4.54	3.27
YLDLZHCH	548	110071008377	1	2008-08-30	2008	3	32	2010-10-12	10	320	L4	11199095	110071005165	11196035	CG	CT	G	T	10346	394.1	316	3.81	3.05
CHY	549	110056008178	1	2008-08-31	2008	15	32					11101927	110056004056	11196046	G	T	G	T
YIZHUANG	550	110015008481	2	2008-08-31	2008	4	32	2011-11-26	11	303	L4	11101902	110015005839	970231	CG	CT	G	T	9832	360.9	313	3.67	3.18
BANHE	551	110045008158	2	2008-09-01	2008	1	33	2011-10-17	10	307	L4	11102919	110045005065	11197314	CG	CT	CG	CT	9221	304.7	297.5	3.3	3.23
YLDLZHCH	552	110071008380	2	2008-09-01	2008	3	33	2011-10-09	10	273	L4	11199095	110071004427		CG	CT	G	T	11032	398.9	362.3	3.62	3.28
YIZHUANG	553	110015008482	1	2008-09-01	2008	4	33	2010-12-11	12	320	L4	11102129	110015004439	970231	C	C	CG	C	11697	435.2	374.9	3.72	3.21
YIZHUANG	554	110015008484	2	2008-09-01	2008	4	33	2011-09-28	9	300	L4	11102129	110015005866	1156557	CG	CT	G	T	7488	282.4	256.6	3.77	3.43
YIZHUANG	555	110015008485	2	2008-09-01	2008	4	33	2011-10-22	10	311	L4	11101929	110015004451	1217794	CG	CT	G	T	11227	363.9	380.5	3.24	3.39
NK4FCH	556	110037008275	2	2008-09-01	2008	6	33	2011-08-18	8	228	L4	11199095	110037202187	11198391	C	C	CG	CT	10756	326.3	337.8	3.03	3.14
NK3FCH	557	110038008191	2	2008-09-02	2008	7	33	2011-07-24	7	316	L4	11102909	110038004014	11196044	C	C	CG	CT	12902	458.2	418.3	3.55	3.24
NK3FCH	558	110038008192	2	2008-09-02	2008	7	33	2011-10-01	10	305	L4	11102919	110038003067	11198378	CG	CT	CG	CT	11034	351.7	323.1	3.19	2.93
NK3FCH	559	110038008193	1	2008-09-02	2008	7	33	2010-10-30	10	311	L4	11199095	110038004091	11196019	CG	CT	G	T	13046	339	407.1	2.6	3.12
YIZHUANG	560	110015008493	1	2008-09-03	2008	4	33	2010-11-22	11	309	L4	11102129	110015005304	1073365	C	C	CG	C	11214	460	364.2	4.1	3.25
NJTH	561	110017A08391	1	2008-09-04	2008	5	33	2010-11-01	11	321	L4	11199095	110071005394		C	C	CG	CT	11314	426.8	355.9	3.77	3.15
BANHE	562	110045008162	2	2008-09-05	2008	1	33	2011-10-23	10	301	L4	11102919	110045005095	11197314	C	C	CG	CT	4893	194.4	165.2	3.97	3.38
XJ1D	563	110001108189	2	2008-09-06	2008	11	33	2011-08-27	8	269	L4	11103543	110001105152	11103050	C	C	CG	CT	12341	442.7	374.1	3.59	3.03
BANHE	564	110045008163	1	2008-09-07	2008	1	33	2010-08-23	8	300	L4	11102919	110045004177	11196100	C	C	C	C	10250	440.6	357	4.3	3.48
XINPU	565	110010208279	1	2008-09-07	2008	13	33	2010-10-04	10	306	L4	11101927	110010097128	396902	CG	CT	CG	CT	9696	358.4	319.1	3.7	3.29
YIZHUANG	566	110015008502	1	2008-09-08	2008	4	33	2010-09-23	9	306	L4	11101929	110015004900	1050177	G	T	G	T	12617	458.4	399.2	3.63	3.16
NK3FCH	567	110038008199	2	2008-09-08	2008	7	33	2011-10-03	10	303	L4	11199095	110038004006	11197314	CG	CT	CG	CT	11629	377.5	398.6	3.25	3.43
NJTH	568	110017A08396	2	2008-09-08	2008	5	33	2011-10-01	10	22	L2	11101916	110071004448	A00009209	CG	CT	CG	CT	5547	322.2	212.5	5.81	3.83
YLDLZHCH	569	110071008399	2	2008-09-09	2008	3	33	2011-09-22	9	290	L4	11199095	110071005195	11193541	CG	CT	CG	CT	9722	317.2	307.2	3.26	3.16
YIZHUANG	570	110015008509	1	2008-09-09	2008	4	33	2010-12-02	12	299	L4	11101902	110015005421	1065102	CG	CT	CG	CT	10032	408.6	311.4	4.07	3.1
YLDXW	571	110064008193	1	2008-09-11	2008	12	33	2010-09-16	9	303	L4	11199995	110064000090	11194108	CG	CT	CG	CT	11571	451.1	371.7	3.9	3.21
YLDXW	572	110064008194	2	2008-09-12	2008	12	33	2011-09-29	9	190	L3	11199095	110064004103	65101037	G	T	G	T	10953	363.8	341.4	3.32	3.12
YIZHUANG	573	110015008519	2	2008-09-14	2008	4	33	2011-12-02	12	297	L4	11101929	110015005494	668474	CG	CT	CG	CT	11969	475.4	396.1	3.97	3.31
YIZHUANG	574	110015008520	1	2008-09-14	2008	4	33	2010-10-07	10	292	L4	11101929	110015004474	1144654	G	T	G	T	12524	481.2	395.9	3.84	3.16
XINPU	575	110010208297	2	2008-09-14	2008	13	33	2011-07-16	7	300	L4	11101927	110010020548	11194108		CT	G	T	8880	339.9	296.5	3.83	3.34
XINPU	576	110010208298	2	2008-09-14	2008	13	33	2011-09-09	9	298	L4	11101927	110010203290		CG	CT	CG	CT	9418	302	309.7	3.21	3.29
YIZHUANG	577	110015008522	1	2008-09-15	2008	4	33	2010-12-17	12	314	L4	11101929	110015003328	1119316	CG	CT	CG	CT	11117	471.9	365.8	4.25	3.29
NK3FCH	578	110038008208	2	2008-09-15	2008	7	33	2011-09-03	9	275	L4	11103543	110038020086	11193541	CG	CT	G	T	8854	334.8	294	3.78	3.32
QUTOU	579	1100440Q8492	2	2008-09-15	2008	8	33	2011-11-02	11	298	L4	11101916	01009Z81		C	C	CG	CT	12822	450.3	386.1	3.51	3.01
YLDXW	580	110064008200	2	2008-09-15	2008	12	33	2011-11-24	11	289	L4	11199995	110064002205	11194161	C	C	G	T	10307	326.5	309.7	3.17	3
YLDLZHCH	581	110071008414	1	2008-09-16	2008	3	33	2010-09-28	9	299	L4	11101916	110071005426	H00940602	G	T	G	T	9921	473	330.3	4.77	3.33
YIZHUANG	582	110015008523	1	2008-09-16	2008	4	33	2010-10-09	10	318	L4	11101929	110015005825	128460878	CG	CT	CG	CT	10654	371.9	339.3	3.49	3.19
XJ1D	583	110001108199	2	2008-09-16	2008	11	33	2011-10-01	10	261	L4	11103543	110001106121	11102129	CG	CT	G	T	10356	371.2	339.8	3.58	3.28
YIZHUANG	584	110015008524	1	2008-09-17	2008	4	33	2010-11-07	11	289	L4	11101902	110015004733	11101930	CG	CT	CG	CT	11142	418.7	358.1	3.76	3.21
NK3FCH	585	110038008212	2	2008-09-18	2008	7	33	2011-11-23	11	317	L4	11199095	110038003052	11194166	C	C	CG	CT	9255	329.1	326.1	3.56	3.52
YLDXW	586	110064008203	1	2008-09-18	2008	12	33	2010-10-08	10	316	L4	11199095	110064004121	5111005	CG	CT	G	T	11423	453.9	363.7	3.97	3.18
NJTH	587	110017A08421	1	2008-09-18	2008	5	33	2011-03-26	3	296	L4	11101916	110071005261	11100519	CG	CT	G	T	11435	400.2	339.5	3.5	2.97
YIZHUANG	588	110015008534	2	2008-09-20	2008	4	33	2011-12-04	12	295	L4	11102129	110015003263	1207292	G	T	G	T	14147	554	455.9	3.92	3.22
QUTOU	589	110044008207	1	2008-09-20	2008	8	33	2010-10-04	10	293	L4	11102912	110044005022	61202010	C	C	G	T	7837	298.6	248.2	3.81	3.17
YLDXW	590	110064008205	2	2008-09-20	2008	12	33	2011-11-11	11	302	L4	11199995	110064002047	11194166	CG	CT	G	T	11737	365.6	357.6	3.11	3.05
BJ5D	591	110026208186	1	2008-09-20	2008	10	33	2011-05-28	5	292	L4	11101906	110026005086	11199090	C	C	CG	CT	10157	420.5	323.4	4.14	3.18
XJ1D	592	110001108204	1	2008-09-21	2008	11	33	2010-09-22	9	294	L4	11103543	110001098146	11194143	CG	CT	G	T	9444	385.5	304.4	4.08	3.22
YLDXW	593	110064008209	2	2008-09-22	2008	12	33	2011-09-13	9	179	L3	11199095	110064004046	11196046	C	C	G	CT	9648	233.4	295.5	2.42	3.06
XINPU	594	110010208323	2	2008-09-22	2008	13	33	2011-11-28	11	281	L4	11101927	110010202128	11197361	C	C	CG	C	7371	227	232.9	3.08	3.16
YIZHUANG	595	110015008539	1	2008-09-23	2008	4	33	2010-10-16	10	311	L4	11102129	110015003234	96786	CG	CT	CG	CT	11825	340.4	363.1	2.88	3.07
YIZHUANG	596	110015008542	2	2008-09-23	2008	4	33	2011-09-07	9	294	L4	11101929	110015003434		G	T	G	T	13444	463	408.1	3.44	3.04
QUTOU	597	110044008212	2	2008-09-24	2008	8	33	2011-10-28	10	303	L4	11101916	110044005119	11100113	CG	CT	G	T	14055	473.7	446.1	3.37	3.17
QUTOU	598	110044008312	1	2008-09-24	2008	8	33	2011-01-13	1	290	L4	11101916	01009Q6338		CG	CT	CG	CT	8728	323.6	277.4	3.71	3.18
YLDCHCH	599	110055908402	2	2008-09-25	2008	2	33	2011-10-30	10	266	L4	11199095	110055002174	11196015	C	C	CG	CT	11974	419.8	380.6	3.51	3.18
NJTH	600	110017A08439	1	2008-09-25	2008	5	33	2010-10-10	10	308	L4	11199095	110071005487	871856	C	C	CG	CT	11048	423.7	344.4	3.83	3.12
CHYYZHZ	601	110032008211	1	2008-09-26	2008	14	33	2010-09-13	9	273	L4	11100113	110032005157	11196018	C	C	G	T	6450	272	199.2	4.22	3.09
NK4FCH	602	110037008324	2	2008-09-26	2008	6	33	2011-09-01	9	306	L4	11103543	110037006129	11102909	C	C	CG	CT				2.86	3.16
NJTH	603	110017A08445	2	2008-09-26	2008	5	33	2011-10-19	10	299	L4	11199095	110071005046	11196035	CG	CT	G	T	11532	389	351.6	3.37	3.05
YLDLZHCH	604	110071008446	2	2008-09-26	2008	3	33	2011-09-03	9	309	L4	11199095	110071004561	A00011763	CG	CT	G	T				3.32	3.16
YIZHUANG	605	110015008547	1	2008-09-27	2008	4	33	2010-10-26	10	336	L4	11102129	110015005471	1148491	CG	CT	G	T	11118	448.2	333.7	4.03	3
XINPU	606	110010208336	1	2008-09-27	2008	13	33	2010-09-22	9	318	L4	11101927	110010205188	11199842	CG	CT	G	T	10274	307.5	327.2	2.99	3.19
QUTOU	607	110044008221	1	2008-09-29	2008	8	33	2010-12-14	12	320	L4	11101902	110044004167	11196023	C	C	C	C	11253	418.9	367.4	3.72	3.26
CHY4D	608	110033008183	2	2008-10-01	2008	16	33	2011-09-01	9	250	L4	11197314	110033006153	11102912	C	C	CG	CT	9121	304	282.3	3.33	3.1
YIZHUANG	609	110015008551	1	2008-10-02	2008	4	33	2010-10-23	10	304	L4	11101929	110015003408		CG	CT	CG	CT	14904	535.3	449.3	3.59	3.01
XINPU	610	110010208346	2	2008-10-02	2008	13	33	2011-09-07	9	300	L4	11101927	110010205190	11199821	CG	CT	CG	CT	13147	391.3	423	2.98	3.22
YLDLZHCH	611	110071008466	1	2008-10-03	2008	3	33	2010-10-28	10	304	L4	11199095	110071004605	11100113	CG	CT	CG	CT	12235	477.3	383.8	3.9	3.14
YLDXW	612	110064008217	2	2008-10-03	2008	12	33	2011-12-08	12	249	L4	11199995	110064005018	11197351	C	C	CG	CT	12023	400.9	339	3.33	2.82
CHYYZHZ	613	110032008222	2	2008-10-04	2008	14	33	2011-11-21	11	233	L4	11197314	110032002218	11196044	C	C	CG	CT	8653	288.6	273	3.34	3.16
QUTOU	614	1100440Q8496	1	2008-10-04	2008	8	33	2011-01-05	1	298	L4	11101916	01009Z64			CT	CG	CT	10777	397.8	340	3.69	3.15
QUTOU	615	1100440Q8497	1	2008-10-04	2008	8	33	2010-11-15	11	314	L4	11101916	01009Z62		C	C	CG	C	12502	439	377.2	3.51	3.02
YLDXW	616	110064008219	1	2008-10-04	2008	12	33	2010-09-28	9	291	L4	11199995	110064004218	11196046	CG	CT	G	T	12518	399.8	396.9	3.19	3.17
YIZHUANG	617	110015008552	2	2008-10-05	2008	4	33	2011-12-10	12	262	L4	11102129	110015005821	903875	CG	CT	G	T	12698	512.3	370.7	4.03	2.92
NK4FCH	618	110037008337	2	2008-10-05	2008	6	33	2011-08-08	8	301	L4	11199095	110037001070	11196023	CG	CT	CG	CT	11646	374	380.5	3.21	3.27
NK4FCH	619	110037008349	1	2008-10-06	2008	6	33	2010-09-04	9	311	L4	11103543	110037006156	11196018	C	C	C	C	10037	353.1	308	3.52	3.07
QUTOU	620	110044008225	2	2008-10-06	2008	8	33	2011-12-09	12	289	L4	11199095	110044003203	11196023	G	T	G	T	12662	462.6	379.2	3.65	2.99
NJTH	621	110017A08469	2	2008-10-06	2008	5	33	2011-09-28	9	53	L2	11101916	110071004081	11199090	CG	CT	G	T	8496	281	281.8	3.31	3.32
NJTH	622	110017X08222	1	2008-10-07	2008	5	33	2010-09-01	9	293	L4	11199095	110064003062	151973	C				9999	412.1	307.4	4.12	3.07
QUTOU	623	110044008234	2	2008-10-08	2008	8	33	2011-10-30	10	301	L4	11101906	110044003037	11195191	CG	CT	CG	CT	10567	404.2	351.9	3.83	3.33
BANHE	624	110045008189	1	2008-10-09	2008	1	33	2010-10-09	10	315	L4	11102919	110045005041	11197314	CG	CT	CG	CT	12437	427.2	402.2	3.43	3.23
YIZHUANG	625	110015008554	2	2008-10-09	2008	4	33	2011-09-28	9	300	L4	11101929	110015004337	2287161	CG	CT	CG	CT	9024	303.9	287.1	3.37	3.18
YIZHUANG	626	110015008555	1	2008-10-09	2008	4	33	2010-11-04	11	292	L4	11101929	110015004328	6215479	CG	CT	G	T	10918	372.7	345.6	3.41	3.17
XINPU	627	110010208357	2	2008-10-09	2008	13	33	2011-09-07	9	213	L4	11101927	110010301043		C	C	CG	CT	11597	461.8	372.8	3.98	3.21
YLDXW	628	110064008228	1	2008-10-10	2008	12	33	2010-12-12	12	312	L4	11199995	110064003189	11196046	CG	CT	CG	CT	10963	385.6	342	3.52	3.12
YLDXW	629	110064008232	1	2008-10-11	2008	12	33	2010-10-07	10	317	L4	11199095	110064004063	23101215	CG	CT	CG	CT	10589	407.7	335.4	3.85	3.17
YIZHUANG	630	110015008557	1	2008-10-12	2008	4	33	2010-11-03	11	293	L4	11101929	110015003412	3071519086	G	T	G	T	12949	419.9	392.8	3.24	3.03
YIZHUANG	631	110015008558	1	2008-10-12	2008	4	33	2010-11-14	11	317	L4	11101929	110015004352	1057935	CG	CT	CG	CT	10736	422.8	345.2	3.94	3.22
YIZHUANG	632	110015008560	2	2008-10-12	2008	4	33	2011-12-13	12	286	L4	11101929	110015005342	1054551	CG	CT	CG	CT	11619	381.8	375.3	3.29	3.23
QUTOU	633	110044008238	1	2008-10-12	2008	8	33	2010-12-23	12	276	L4	11101902	110044004181	11196023	G	T	G	T	8271	311.6	253.1	3.77	3.06
NJTH	634	110017A08476	2	2008-10-12	2008	5	33	2011-11-13	11	274	L4	11199095	110071004462	A00009783	CG	CT	G	T	11270	333	335.8	2.95	2.98
YLDXW	635	110064008235	2	2008-10-14	2008	12	33	2011-12-01	12	317	L4	11199095	110064003137	11198378	CG	CT	G	T	11801	379.8	381.9	3.22	3.24
YLDCHCH	636	110055008149	1	2008-10-15	2008	2	33	2011-03-07	3	293	L4	11199095	110055005046	11196050	C	C	CG	CT	10089	305.1	301.5	3.02	2.99
YLDLZHCH	637	110071008485	1	2008-10-15	2008	3	33	2010-10-30	10	302	L4	11199095	110071002146	5078205	C	C	G	CT	11390	434.1	340.5	3.81	2.99
YIZHUANG	638	110015008563	1	2008-10-15	2008	4	33	2010-11-16	11	315	L4	11101902	110015004715	11100113	CG	CT	CG	CT	11874	427.7	391.5	3.6	3.3
NJTH	639	110017A08487	2	2008-10-16	2008	5	33	2011-09-09	9	129	L3	11199095	110071006238	61204019	CG	CT	G	T	6685	237.7	229.8	3.56	3.44
YLDLZHCH	640	110071008489	2	2008-10-16	2008	3	33	2011-09-19	9	328	L4	11199095	110071005637	H00981227	CG	CT	G	T				4.14	3.2
SANFA	641	110046008207	1	2008-10-17	2008	9	33	2010-10-11	10	314	L4	11100113	110046002004	11197314	CG	CT	G	T	10251	342.1	335.9	3.34	3.28
CHYYZHZ	642	110032008234	1	2008-10-19	2008	14	33	2010-09-17	9	299	L4	11197314	110032004231	11100113	G	T	G	T	9357	392.3	310	4.19	3.31
NK3FCH	643	110038008251	1	2008-10-19	2008	7	33	2010-10-27	10	314	L4	11199095	110038003212	11196044	C	C	G	T	9775	250.6	306.1	2.56	3.13
QUTOU	644	110044008244	2	2008-10-19	2008	8	33	2011-12-02	12	296	L4	11101902	110044002189	125	G	T	G	T	10441	370.5	292.2	3.55	2.8
YLDLZHCH	645	110071008498	1	2008-10-20	2008	3	33	2010-12-01	12	298	L4	11199095	110071004466	A00003631	CG	CT	G	T	11065	438	331.2	3.96	2.99
YLDCHCH	646	110055008153	2	2008-10-21	2008	2	33	2011-10-10	10	320	L4	11199095	110055003197	11100113	C	C	G		11883	407.5	369.3	3.43	3.11
YIZHUANG	647	110015008571	2	2008-10-22	2008	4	33	2011-12-13	12	286	L4	11101929	110015004913	1050982	CG	CT	G	T	13743	420.3	443.8	3.06	3.23
YIZHUANG	648	110015008572	2	2008-10-22	2008	4	33	2011-11-24	11	305	L4	11101929	110015003350	967797	CG	CT	G	T	11826	385.9	340.1	3.26	2.88
YLDXW	649	110064008242	2	2008-10-22	2008	12	33	2011-10-02	10	281	L4	11199095	110064004134	11196046	C	C	CG	CT	8582	312.6	272.4	3.64	3.17
YLDXW	650	110064008243	2	2008-10-22	2008	12	33	2011-10-21	10	297	L4	11199095	110064005210	11197351	CG	CT	CG	CT	11085	358.2	324.6	3.23	2.93
YLDXW	651	110064008245	1	2008-10-23	2008	12	33	2010-10-08	10	316	L4	11199095	110064005046	11194108	C	C	CG	CT	12135	402.3	386.6	3.32	3.19
YLDXW	652	110064008246	1	2008-10-23	2008	12	33	2010-11-23	11	331	L4	11199095	110064005019	11197351	CG	CT	G	T	9075	381.1	288.9	4.2	3.18
YLDCHCH	653	110055908538	2	2008-10-25	2008	2	33	2011-09-05	9	228	L4	11199095	409007506	668474	CG	CT	G	T	10655	314.8	351.7	2.95	3.3
CHYYZHZ	654	110032008241	1	2008-10-26	2008	14	33	2010-09-29	9	313	L4	11197314	110032005176	51102010	CG	CT	CG	CT	10940	401.5	354.8	3.67	3.24
YLDLZHCH	655	110071008513	1	2008-10-28	2008	3	33	2010-11-03	11	298	L4	11199095	110071005082	11100113	CG	CT	G	T	7714	211.7	258.2	2.74	3.35
BJ5D	656	110023008225	1	2008-10-28	2008	10	33					11102912	110026005129	11102008	CG	CT	G	T
YLDLZHCH	657	110071008514	1	2008-10-29	2008	3	33	2011-07-22	7	261	L4	11199095	110071004559	A00007327	CG	CT	G	T	12094	422.3	348.4	3.49	2.88
YLDXW	658	110064008250	1	2008-10-29	2008	12	33	2010-10-17	10	307	L4	11199995	110064002028	11194166	C	C	CG	CT	10469	391.6	327.7	3.74	3.13
YLDXW	659	110064008251	2	2008-10-29	2008	12	33	2011-10-09	10	309	L4	11199095	110064005197	11197351	C	C	CG	CT	10477	342.3	331.9	3.27	3.17
CHYYZHZ	660	110032008247	2	2008-11-01	2008	14	33	2011-11-01	11	281	L4	11197314	110032004012	11196018	C	C	C	C	12900	530.4	455.4	4.11	3.53
QUTOU	661	110044008262	2	2008-11-01	2008	8	33	2011-11-05	11	260	L4	11101902	110044099108	11194160	G	T	G	T	8006	59.3	50.6	0.74	0.63
YIZHUANG	662	110015008588	1	2008-11-03	2008	4	33	2010-11-27	11	304	L4	11101929	110015004425	5319769	G	T	G	T	12189	477.8	382.4	3.92	3.14
YLDXW	663	110064008257	1	2008-11-03	2008	12	33	2010-12-11	12	313	L4	11199095	110064006116	11100113	C	C	G	CT	10819	355.5	340.9	3.29	3.15
YIZHUANG	664	110015008591	2	2008-11-04	2008	4	33	2011-11-19	11	310	L4	11101929	110015005361	1059681	CG	CT	CG	CT	11979	408.3	377	3.41	3.15
YLDXW	665	110064008264	1	2008-11-10	2008	12	33	2010-11-18	11	306	L4	11199095	110064005220	11197351	C	C	G	T	11438	405	369.8	3.54	3.23
YLDXW	666	110064008265	2	2008-11-11	2008	12	33	2011-11-25	11	288	L4	11199095	110064003141	11196044		CT	G	T	12645	398.6	362	3.15	2.86
YLDXW	667	110064008266	2	2008-11-11	2008	12	33	2011-12-06	12	277	L4	11199095	110064003141	11196044	C		G	T	9319	290.1	262.3	3.11	2.81
CHYYZHZ	668	110032008258	2	2008-11-12	2008	14	33	2011-11-13	11	269	L4	11197314	110032001056	11193550	G	T	G	T	11477	400.2	350.7	3.49	3.06
YLDXW	669	110064008267	2	2008-11-12	2008	12	33	2011-10-15	10	268	L4	11199995	110064001107	11194166	C	C	C	C	10207	341	329.9	3.34	3.23
CHYYZHZ	670	110032008260	1	2008-11-14	2008	14	33	2010-11-23	11	294	L4	11197314	110032003071	11199815	CG	CT	G	T	9879	340.4	282.7	3.45	2.86
YLDXW	671	110064008270	1	2008-11-14	2008	12	33	2010-11-12	11	312	L4	11199095	110064003038	94191	CG	CT	CG	CT	13535	409.1	416.1	3.02	3.07
YIZHUANG	672	110015008606	1	2008-11-15	2008	4	33	2010-12-12	12	319	L4	11101929	110015004870	1156557	CG	CT	CG	CT	11438	348	358.2	3.04	3.13
QUTOU	673	110044008286	2	2008-11-17	2008	8	33	2011-12-17	12	71	L2	11101906	110044003018	11194165	C	C	C	C	7711	328.9	252.1	4.27	3.27
YIZHUANG	674	110015008611	1	2008-11-20	2008	4	33	2010-11-27	11	304	L4	11101929	110015004319	1050982	G	T	G	T	10606	375.2	341.1	3.54	3.22
YLDLZHCH	675	110071008555	1	2008-11-23	2008	3	33	2010-12-08	12	291	L4	11101916	110071005364	A00013472	CG	CT	G	T	6484	253.6	207.9	3.91	3.21
NK3FCH	676	110038008284	1	2008-11-23	2008	7	33	2010-11-24	11	321	L4	11199095	110038003050	11197314	CG	CT	G	T	10741	325.9	327.6	3.03	3.05
YLDXW	677	110064008279	1	2008-11-28	2008	12	33	2010-11-16	11	308	L4	11199995	110064003200	11196046	CG	CT	CG	CT	8988	332.9	296.2	3.7	3.3
YIZHUANG	678	110015008627	1	2008-12-01	2008	4	34	2010-12-03	12	298	L4	11101929	110015003316		G	T	G	T	11224	476.7	361.6	4.25	3.22
YLDXW	679	110064008283	2	2008-12-03	2008	12	34	2011-11-08	11	279	L4	11199995	110064099182	11194127	CG	CT	CG	CT	8486	290.7	270.5	3.43	3.19
NJTH	680	110017Z08323	1	2008-12-03	2008	5	34	2011-02-10	2	311	L4	11101916	1223	11184919	C	C	C	C	10102	392	311.9	3.88	3.09
NJTH	681	110017A08572	1	2008-12-04	2008	5	34	2010-11-28	11	294	L4	11101916	110071005144	11196035	G	T	G	T	9901	437	299.1	4.41	3.02
DRW	682	110043008325	1	2008-12-05	2008	17	34	2010-12-06	12	321	L4	11101916	110043H96114		C	C	CG	CT	10789	375.7	331.8	3.48	3.08
BJ5D	683	110026208264	1	2008-12-05	2008	10	34	2011-04-28	4	322	L4	11101929	110026006261	11101930	CG	CT	CG	CT	11192	405.4	357.5	3.62	3.19
YLDLZHCH	684	110071008577	1	2008-12-06	2008	3	34	2010-12-11	12	288	L4	11101916	110071005024	11100113	C	C	CG	CT	13151	509.1	385.7	3.87	2.93
YLDXW	685	110064008288	1	2008-12-07	2008	12	34	2011-03-30	3	311	L4	11199095	110064000144	11197361	C	C	CG	CT	12165	417	398.2	3.43	3.27
YLDXW	686	110064008289	1	2008-12-07	2008	12	34	2010-12-13	12	311	L4	11199095	110064003270	11196046					13211	454.8	409.5	3.44	3.1
DRW	687	110043008327	2	2008-12-07	2008	17	34	2011-10-12	10	67	L2	11101916	110043004013	11196046	C	C	C	C	1410	49.3	57.7	3.5	4.09
BJ5D	688	110023008268	1	2008-12-08	2008	10	34					11102912	110026006217	11101930	C	C	G
DRW	689	110043008330	1	2008-12-09	2008	17	34	2010-11-08	11	314	L4	11101916	110043006223	10569537	C	C	CG	C	7921	293.8	250.7	3.71	3.16
YLDLZHCH	690	110071008586	1	2008-12-10	2008	3	34	2010-12-11	12	288	L4	11101916	110071002358	11194127	C	C	CG	CT	7577	305.4	249.5	4.03	3.29
YLDLZHCH	691	110071008588	1	2008-12-10	2008	3	34	2010-12-09	12	290	L4	11101916	110071004095	53201031	G	T	G	T	12410	544.2	398.3	4.39	3.21
YLDCHCH	692	110055008191	1	2008-12-11	2008	2	34	2011-06-12	6	313	L4	11101916	110055005127	11196100	G	T	G	T	12994	403.9	412.9	3.11	3.18
YIZHUANG	693	110015008650	2	2008-12-18	2008	4	34	2011-12-02	12	235	L4	11101902	110015004742	11199095	G	T	G	T	7098	298.3	228.4	4.2	3.22
BJ5D	694	110023008278	1	2008-12-19	2008	10	34					11101906	110026006279	11101930	C	C	CG	CT
YIZHUANG	695	110015008657	1	2008-12-23	2008	4	34	2010-12-10	12	291	L4	11101902	110015005756	11197580	CG	CT	CG	CT	9951	349.7	283.6	3.51	2.85
YLDLZHCH	696	110071008608	1	2008-12-27	2008	3	34	2010-12-22	12	312	L4	11101916	110071004159	11196035	CG	CT	CG	CT	11228	418.4	338.5	3.73	3.01
CHYYZHZ	697	110032008314	1	2008-12-29	2008	14	34	2010-12-03	12	284	L4	11197314	110032006214	11196018	CG	CT	CG	CT	9495	345.8	300.9	3.64	3.17
YLDLZHCH	698	110071009004	1	2009-01-02	2009	3	44	2011-03-16	3	284	L4	11101916	110071004293	11194115	C	C	C	C	12271	429.3	359.6	3.5	2.93
YLDXW	699	110064009002	1	2009-01-02	2009	12	44	2011-06-03	6	308	L4	11199995	110064004123	31101006	CG	T	G	T	7319	300.7	252	4.11	3.44
YLDCHCH	700	110055009002	1	2009-01-05	2009	2	44	2011-04-09	4	295	L4	11101916	110055006174	11101929	G	T	G	T	13076	370.8	420.2	2.84	3.21
BJ5D	701	110023009009	1	2009-01-06	2009	10	44					11102912	110026006192	11102909	CG	CT	G	T
XJ1D	702	110001009002	1	2009-01-08	2009	11	44	2011-03-29	3	316	L4	11101929	110001106190	11102909	CG	CT	G	T	9451	283	286	2.99	3.03
XJ1D	703	110001009005	1	2009-01-09	2009	11	44	2011-03-28	3	261	L4	11103543	110001105221	11102129	CG	CT	G	T	10756	329.4	334.7	3.06	3.11
QUTOU	704	110044009003	1	2009-01-10	2009	8	44	2010-12-24	12	310	L4	11101902	110044005018	31102402	CG	CT	CG	CT	12145	448.1	404.1	3.69	3.33
QUTOU	705	110044009004	2	2009-01-10	2009	8	44	2011-12-20	12	313	L4	11101902	110044004209	11196023	C	C	C	C	11720	348.7	369.4	2.98	3.15
YLDXW	706	110064009013	1	2009-01-11	2009	12	44	2011-04-11	4	268	L4	11199095	110064002170	11194166	C	C	G	CT	11133	350.3	349.4	3.15	3.14
NJTH	707	110017I09007	1	2009-01-12	2009	5	44	2011-01-29	1	295	L4	11101916	06324	31104442	C	C	C	C	10935	431.2	330.2	3.94	3.02
NK3FCH	708	110038009006	1	2009-01-13	2009	7	44	2011-04-12	4	182	L3	11103543	110038004141	11196018	CG	CT	CG	CT	10191	326.5	314.2	3.2	3.08
QUTOU	709	110044009006	1	2009-01-13	2009	8	44	2011-03-28	3	307	L4	11101902	110044004008	11196023			G		9185	311.7	267.8	3.39	2.92
NK3FCH	710	110038009007	1	2009-01-15	2009	7	44	2011-04-19	4	289	L4	11103543	110038005166	23103230	CG	CT	G	T	10923	339.8	337.6	3.11	3.09
YLDXW	711	110064009015	1	2009-01-15	2009	12	44	2012-04-28	4	281	L4	11199095	110064004199	11197351	CG	CT	CG	CT	10958	387.6	352.5	3.54	3.22
QUTOU	712	110044009009	2	2009-01-17	2009	8	44	2011-12-10	12	288	L4	11101906	110044001125	11195019	CG	CT	CG	T	11946	434.1	362.8	3.63	3.04
YLDLZHCH	713	110071009030	1	2009-01-18	2009	3	44	2011-04-16	4	302	L4	11101916	110071005653	A00013437	G	T	G	T	10360	336.4	319.2	3.25	3.08
NK4FCH	714	110037009022	1	2009-01-18	2009	6	44	2011-07-03	7	274	L4	11199095	110037006332	11196035	CG	CT	CG	CT	9291	283.6	297.1	3.05	3.2
QUTOU	715	1100440Q9344	1	2009-01-18	2009	8	44	2011-03-10	3	290	L4	11199095	01009Z136		CG	CT	G	T	9991	360.6	328.2	3.61	3.29
YLDCHCH	716	110055109012	1	2009-01-20	2009	2	44	2011-04-08	4	296	L4	11101929	110055106184	11101917	CG	CT	CG	CT	11689	461	384.8	3.94	3.29
CHY	717	110056009019	1	2009-01-22	2009	15	44					11102912	110056003228	11196046	CG	CT	G	T
SANFA	718	110046009015	1	2009-01-22	2009	9	44	2011-03-25	3	268	L4	11199995	110046004172	11196100	CG	CT	CG	CT	8531	360.3	272.9	4.22	3.2
QUTOU	719	1100440Q9347	1	2009-01-23	2009	8	44	2011-02-16	2	256	L4	11199095	01009Z184		C	C	G	T	12375	398.2	376.5	3.22	3.04
NK3FCH	720	110038009014	1	2009-01-24	2009	7	44	2011-06-06	6	304	L4	11103543	110038005097	11100260	C	C	C	C	11986	382.1	375	3.19	3.13
YIZHUANG	721	110015009039	1	2009-01-25	2009	4	44	2011-06-18	6	311	L4	11101929	110015005387	854821	CG	CT	CG	CT	11796	511.1	391.8	4.33	3.32
QUTOU	722	110044009018	1	2009-01-26	2009	8	44	2011-01-23	1	311	L4	11101906	110044000074	11196046	C	C	CG	CT	12897	476.8	420.5	3.7	3.26
QUTOU	723	110044009020	1	2009-01-28	2009	8	44	2011-05-13	5	317	L4	11101916	110044004090	11196023	CG	CT	CG	CT	13159	535.8	399.6	4.07	3.04
NK3FCH	724	110038009021	1	2009-01-29	2009	7	44	2011-05-08	5	303	L4	11101929	110038007016	11199095	CG	CT	G	T	10429	332.3	333.4	3.19	3.2
BJ5D	725	110026209028	1	2009-01-30	2009	10	44	2011-04-28	4	322	L4	11101929	110026005164	11101929	G	T	G	T	8132	304.8	267.8	3.75	3.29
YLDCHCH	726	110055009022	1	2009-02-01	2009	2	44	2011-01-25	1	305	L4	11101916	110055000117	11193546	CG	CT	CG	CT	11293	327.9	360.3	2.9	3.19
NK4FCH	727	110037009030	1	2009-02-01	2009	6	44	2011-05-24	5	314	L4	11199095	110037005258	11101927	CG	CT	CG	CT	9840	306.1	299.9	3.11	3.05
QUTOU	728	110044009021	1	2009-02-01	2009	8	44	2011-03-16	3	319	L4	11101906	110044003005	11194165					9228	378.7	296.9	4.1	3.22
SANFA	729	110046009020	1	2009-02-01	2009	9	44	2011-05-16	5	307	L4	11199995	110046005237	11198391	C	C	C	C	9508	338.1	296.8	3.56	3.12
SANFA	730	110046009021	1	2009-02-01	2009	9	44	2011-04-02	4	288	L4	11199995	110046003078	11196018	CG	CT	CG	CT	9335	361	310.1	3.87	3.32
BJ5D	731	110023009030	1	2009-02-02	2009	10	44					11101929	110023006311	11102909	CG	CT	CG	CT
YLDCHCH	732	110055009027	1	2009-02-03	2009	2	44	2011-02-08	2	262	L4	11101916	110055005003	11196050	CG	CT	CG	CT	10683	350.7	306.2	3.28	2.87
NK3FCH	733	110038009026	1	2009-02-04	2009	7	44	2011-04-21	4	320	L4	11103543	110038006262	11197351	C	C	CG	CT	10229	314.8	322.5	3.08	3.15
BJ5D	734	110023009032	1	2009-02-04	2009	10	44					11101906	110026004226	11100113	C	C	G	T
BJ5D	735	110023009033	1	2009-02-05	2009	10	44					11101929	110025002096	11196015	CG	CT	G	T
NK3FCH	736	110038009030	1	2009-02-06	2009	7	44	2011-04-08	4	300	L4	11103543	110038006244	31104181	CG	CT	G	T	11308	361.6	357.3	3.2	3.16
YLDLZHCH	737	110071009053	1	2009-02-07	2009	3	44	2011-06-23	6	290	L4	11101916	110071006025	13103024	CG	CT	CG	CT	12091	414.1	389.9	3.43	3.22
NK3FCH	738	110038009032	1	2009-02-07	2009	7	44	2011-03-21	3	318	L4	11101929	110038006248	15104454	G	T	G	T	11130	282.1	367.9	2.53	3.31
SANFA	739	110046009024	1	2009-02-08	2009	9	44	2011-05-01	5	294	L4	11199995	110046004019		C	C	C	C	9057	369.6	301.1	4.08	3.32
NK3FCH	740	110038009037	1	2009-02-09	2009	7	44	2011-05-11	5	300	L4	11103543	110038005185	23103230	G	T	G	T	10781	333.5	346.7	3.09	3.22
YLDLZHCH	741	110071009058	1	2009-02-12	2009	3	44	2011-03-15	3	299	L4	11101916	110071005064	11196035	CG	CT	G	T	11028	368.1	325.4	3.34	2.95
SANFA	742	110046009025	1	2009-02-12	2009	9	44	2011-06-17	6	275	L4	11199995	110046002177	11197314					10518	381.9	337.1	3.63	3.2
CHY	743	110031609044	1	2009-02-13	2009	15	44	2011-04-13	4	299	L4	11102912	110056002210	11199842	C	C	G		9753	308.9	324.5	3.17	3.33
YLDXW	744	110064009034	1	2009-02-13	2009	12	44	2011-04-03	4	257	L4	11199995	110064004154	11196046	CG	CT	CG		6810	248.3	220.7	3.65	3.24
NK3FCH	745	110038009043	1	2009-02-16	2009	7	44	2011-03-24	3	315	L4	11103543	110038004174	11196018	C	C	CG	CT	11190	337.7	361.9	3.02	3.23
QUTOU	746	110044009030	1	2009-02-16	2009	8	44	2011-02-21	2	282	L4	11101916	110044001048	11195019	CG	CT	CG	CT	10748	421.4	339.9	3.92	3.16
QUTOU	747	110044009402	1	2009-02-17	2009	8	44	2011-03-19	3	316	L4	11199995	01044W76		C	C	C	C	8655	316.5	271.7	3.66	3.14
YIZHUANG	748	110015009090	1	2009-02-20	2009	4	44	2011-06-12	6	317	L4	11101929	110015004427	1142659	CG	CT	CG	CT	12645	428.4	409.5	3.39	3.24
SANFA	749	110046009032	1	2009-02-20	2009	9	44	2011-08-15	8	307	L4	11199995	110046005199	11198391	CG	CT	CG	CT	10946	385.6	329.8	3.52	3.01
CHY4D	750	110033009029	1	2009-02-23	2009	16	44	2011-03-28	3	315	L4	11197314	110033005182	11196100	CG	CT	CG	CT	10790	361	322.7	3.35	2.99
CHY4D	751	110033009031	1	2009-02-25	2009	16	44	2011-04-19	4	293	L4	11197314	110033004105	9228	CG	CT	CG	CT	9836	347.3	326.6	3.53	3.32
BJ5D	752	110023009046	1	2009-02-25	2009	10	44					11102912	110026006239	11102909
YLDCHCH	753	110055009052	1	2009-02-26	2009	2	44	2011-04-06	4	298	L4	11101916	110055001248	11196015	G	T	G	T	11387	472.5	388	4.15	3.41
SANFA	754	110046009037	1	2009-02-27	2009	9	44	2011-08-14	8	308	L4	11199995	110046007010	11101917	C	C	C	C	11529	446.1	366.4	3.87	3.18
NK3FCH	755	110038009057	1	2009-03-01	2009	7	41	2011-04-19	4	289	L4	11199095	110038004065	11196044	CG	CT	CG	CT	11278	350.6	360.4	3.11	3.2
BJ5D	756	110023009054	1	2009-03-04	2009	10	41					11102912	110026005249	11102013	CG	CT	G	T
YLDCHCH	757	110055009057	1	2009-03-05	2009	2	41	2011-04-01	4	303	L4	11101916	110055001215	11195006	C	C	C	C	12898	401	377.1	3.11	2.92
YLDCHCH	758	110055009059	1	2009-03-05	2009	2	41	2011-04-09	4	295	L4	11101916	110055001212	11195006	C	C	C	C	10148	393.1	327.8	3.87	3.23
BJ5D	759	110023009055	1	2009-03-05	2009	10	41					11101929	110026006119	11102008	CG	CT	G	T
BJ5D	760	110023009056	1	2009-03-06	2009	10	41					11101929	110026006007	11199842	G	T	G	T
YLDCHCH	761	110055009062	1	2009-03-09	2009	2	41	2011-02-27	2	301	L4	11101916	110055004143	11100113	G	T	G	T	10295	383.5	331.3	3.72	3.22
YLDLZHCH	762	110071009102	1	2009-03-10	2009	3	41	2011-03-15	3	299	L4	11101916	110071007019	11102687	C	C	CG	CT	10537	503.6	340.6	4.78	3.23
NK3FCH	763	110038009063	1	2009-03-10	2009	7	41	2011-04-04	4	304	L4	11103543	110038005212	11100260	CG	CT	G	T	8184	232.2	255.3	2.84	3.12
NK3FCH	764	110038009066	1	2009-03-12	2009	7	41	2011-06-08	6	272	L4	11101929	110038006272	11102919	CG	CT	CG	CT	11343	351.2	363.1	3.1	3.2
NK3FCH	765	110038009068	1	2009-03-14	2009	7	41	2011-05-07	5	271	L4	11103543	110038007026	11199095	CG	CT	G	T	11011	342.5	329.6	3.11	2.99
CHY4D	766	110033009047	1	2009-03-16	2009	16	41	2011-07-11	7	302	L4	11197314	110033005213	13203023	G	T	G	T	8765	347.1	279.5	3.96	3.19
YLDLZHCH	767	110071009113	1	2009-03-16	2009	3	41	2011-04-01	4	317	L4	11101916	110071005304	11194166	C	C	G	CT	9140	248.1	299.5	2.71	3.28
NK3FCH	768	110038009072	1	2009-03-16	2009	7	41	2011-03-23	3	316	L4	11103543	110038006036	13203057	C	C	G	T	12964	354.8	398.1	2.74	3.07
NJTH	769	110017A09111	1	2009-03-16	2009	5	41	2011-03-17	3	305	L4	11101916	110017705235	23103228	G	T	G	T	11802	448.5	372.1	3.8	3.15
BJ5D	770	110026209062	1	2009-03-16	2009	10	41	2011-04-23	4	291	L4	11101929	110023007012	11101930	CG	CT	G	T	10782	337.5	331.4	3.13	3.07
YLDCHCH	771	110055009066	1	2009-03-17	2009	2	41	2011-04-19	4	250	L4	11101916	110055005124	11196100	C	C	CG	CT	10789	379.1	333.3	3.51	3.09
NK3FCH	772	110038009073	1	2009-03-17	2009	7	41	2011-03-28	3	252	L4	11103543	110038007015	11199095	C	C	G	T	9920	306.9	338.7	3.09	3.41
CHYYZHZ	773	110032009072	1	2009-03-18	2009	14	41	2011-03-23	3	266	L4	11101916	110032005242	11102912	CG	CT	G	T	10500	418	332.9	3.98	3.17
CHY4D	774	110033009048	1	2009-03-18	2009	16	41	2011-03-29	3	260	L4	11197314	110033006025	11196015	CG	CT	CG	CT	9610	359.1	301.7	3.74	3.14
NJTH	775	110017A09121	1	2009-03-19	2009	5	41	2011-06-06	6	315	L4	11101916	110071007098	31104169	G	T	G	T	9540	398.9	339.2	4.18	3.56
NK3FCH	776	110038009079	1	2009-03-20	2009	7	41	2011-06-16	6	294	L4	11101929	110038007017		G	T	G	T	9999	363.1	316.3	3.63	3.16
SANFA	777	110046009062	1	2009-03-20	2009	9	41	2011-04-28	4	297	L4	11199995	110046007004	11101907	C	C	C	C	12807	403	388.2	3.15	3.03
YLDLZHCH	778	110071009128	1	2009-03-24	2009	3	41	2011-04-21	4	262	L4	11101916	110071006153	31104165	CG	CT	G	T	10116	334.3	302.8	3.31	2.99
QUTOU	779	110044009064	1	2009-03-25	2009	8	41	2011-03-29	3	306	L4	11101902	110044005117	11196273	G	T	G	T	8439	256	275.9	3.03	3.27
YLDLZHCH	780	110071009131	1	2009-03-26	2009	3	41	2011-04-17	4	301	L4	11101916	110071004455	A00011423	CG	CT	CG	CT	10829	500.7	354.3	4.62	3.27
NK4FCH	781	110037009085	1	2009-03-26	2009	6	41	2011-06-16	6	260	L4	11199095	110037005246	11101927	C	C	CG	CT	9763	340	305.4	3.48	3.13
YLDCHCH	782	110055009073	1	2009-03-29	2009	2	41	2011-06-06	6	292	L4	11101916	110055005203	11101927	CG	CT	CG	CT	9195	322.2	303.6	3.5	3.3
YLDCHCH	783	110055009074	1	2009-03-29	2009	2	41	2011-04-07	4	297	L4	11199095	110055004076	13101453	CG	CT	G	T	11340	382.5	355.8	3.37	3.14
CHYYZHZ	784	110032009087	1	2009-03-29	2009	14	41	2011-03-16	3	301	L4	11197314	110032005113	11101927	CG	CT	CG	CT	10303	364.5	301.2	3.54	2.92
YIZHUANG	785	110015009159	1	2009-03-30	2009	4	41	2011-06-08	6	293	L4	11101902	110015005713	11102396	CG	CT	G		10702	413.6	327.1	3.86	3.06
YLDLZHCH	786	110071009140	1	2009-03-31	2009	3	41	2011-05-12	5	304	L4	11101916	110071004554	A00008643	CG	CT	CG	CT	11481	481.7	372.9	4.2	3.25
QUTOU	787	110044009071	1	2009-04-01	2009	8	41	2011-03-24	3	276	L4	11102912	110044001097	11193553	C	C	CG	CT	10610	360.1	345	3.39	3.25
YLDCHCH	788	110055009078	1	2009-04-02	2009	2	41	2011-04-04	4	300	L4	11199095	110055006265	11101929	CG	CT	G	T	11457	382.5	350.8	3.34	3.06
YLDLZHCH	789	110071009141	1	2009-04-02	2009	3	41	2011-04-04	4	314	L4	11101916	110071005306	11100519	G	T	G	T	11616	398.7	357	3.43	3.07
QUTOU	790	110044009492	1	2009-04-03	2009	8	41	2011-08-19	8	311	L4	11102129	153249	13312076	C	C	CG	C	6541	253	212.9	3.87	3.26
XJ1D	791	110001009044	1	2009-04-03	2009	11	41	2011-04-28	4	321	L4	11103543	110001103190	11194166	C	C	CG	CT	12280	445.4	383.4	3.63	3.12
BJ5D	792	110023009079	1	2009-04-04	2009	10	41					11101929	110026003082	11194108	G	T	G	T
NK4FCH	793	110037009094	1	2009-04-05	2009	6	41	2011-03-23	3	316	L4	11199095	110037B20075		CG	CT	G	T	10462	325.1	330.7	3.11	3.16
NK3FCH	794	110038009094	1	2009-04-05	2009	7	41	2011-05-14	5	297	L4	11101929	110038007048	135654446	CG	CT	CG	CT	7952	280	273.2	3.52	3.44
XJ1D	795	110001009048	1	2009-04-06	2009	11	41	2011-06-29	6	259	L4	11103543	110001104040	11100113		CT	G	T	10567	300.7	342.7	2.85	3.24
NJTH	796	110017A09146	1	2009-04-06	2009	5	41	2011-06-18	6	303	L4	11101916	110071004562	A00014145	C	C	C	C	11434	506.6	370.9	4.43	3.24
YLDCHCH	797	110055009081	1	2009-04-07	2009	2	41	2011-07-06	7	262	L4	11199095	110055004085	11100113	CG	CT	G	T	11256	333.2	357.9	2.96	3.18
YLDCHCH	798	110055009082	1	2009-04-10	2009	2	41	2011-05-16	5	285	L4	11199095	110055006023	13203023	CG	CT	G	T	10208	353.1	326.7	3.46	3.2
YLDLZHCH	799	110071009152	1	2009-04-11	2009	3	41	2011-04-01	4	282	L4	11101916	110071006342	11197314	G	T	G	T	11104	381.4	349.1	3.44	3.14
YLDXW	800	110064009071	1	2009-04-11	2009	12	41	2011-04-06	4	304	L4	11199095	110064005223	11197351	CG	T	CG		11946	413.1	360.8	3.46	3.02
NJTH	801	110017A09157	1	2009-04-15	2009	5	41	2011-04-08	4	311	L4	11101916	110071005517	A00011462	CG	CT	G	T	10955	450.9	355.6	4.12	3.25
QUTOU	802	110044009408	1	2009-04-16	2009	8	41	2011-04-06	4	238	L4	11199095	01044W5242			CT	CG	CT	7980	223.7	224.9	2.8	2.82
CHYYZHZ	803	110032009105	1	2009-04-17	2009	14	41	2011-07-12	7	275	L4	11197314	110032005097	11196019	CG	CT	G	T	9682	346.8	312.1	3.58	3.22
NK4FCH	804	110037009105	1	2009-04-18	2009	6	41	2011-07-14	7	295	L4	11103543	110037007008	11196100	C	C	G	T	9510	321.3	313.1	3.38	3.29
NJTH	805	110017W09087	1	2009-04-19	2009	5	41	2011-03-28	3	294	L4	11199095	110055006223	41403502	G	T	G	T	10037	350.4	301.4	3.49	3
YLDCHCH	806	110055009089	1	2009-04-20	2009	2	41	2011-04-18	4	251	L4	11199095	110055005262	13703023	C	C	CG	CT	10109	322	296.9	3.19	2.94
YLDCHCH	807	110055009090	1	2009-04-21	2009	2	41	2011-04-22	4	309	L4	11199095	110055005147	11196100	G	T	G	T	12823	379.4	389.6	2.96	3.04
CHYYZHZ	808	110032009108	1	2009-04-21	2009	14	41	2011-04-03	4	309	L4	11197314	110032007050	11196035	C	C	C	C	11251	460.4	355.5	4.09	3.16
CHYYZHZ	809	110032009109	1	2009-04-23	2009	14	41	2011-04-06	4	222	L4	11197314	110032001185	11194166	C	C	CG	CT	10498	416	314.2	3.96	2.99
CHY	810	110031609100	1	2009-04-24	2009	15	41	2011-05-08	5	303	L4	11102912	110056003087		C	C	CG	C	8008	279.5	262.8	3.49	3.28
YLDLZHCH	811	110071009166	1	2009-04-24	2009	3	41	2011-04-03	4	315	L4	11101916	110071005622	C05918820	CG	CT	G	T	9367	412	306.6	4.4	3.27
QUTOU	812	110044009078	1	2009-04-25	2009	8	41	2011-03-23	3	312	L4	11101902	110044004137	11196023	G	T	G	T	9169	342.7	285.1	3.74	3.11
YIZHUANG	813	110015009180	1	2009-04-26	2009	4	41	2011-04-20	4	307	L4	11102129	110015004671	11198748		CT	G	T	11011	410.4	337.2	3.73	3.06
QUTOU	814	110044009080	1	2009-04-26	2009	8	41	2011-07-08	7	289	L4	11101902	110044004253		CG	CT	G	T	9958	381.3	316.2	3.83	3.18
DRW	815	110043009119	1	2009-04-26	2009	17	41	2011-04-20	4	270	L4	11199095	1100430Z7027		CG	CT	G	T	9096	290.6	285.6	3.19	3.14
CHY	816	110031609102	1	2009-04-27	2009	15	41	2011-05-30	5	316	L4	11102912	110056004284	11101914	C	C	CG	CT	11054	395.7	358.6	3.58	3.24
SANFA	817	110046009084	1	2009-04-27	2009	9	41	2011-04-23	4	302	L4	11102129	110046007028	11101917	C	C	G	T	8280	225	274.8	2.72	3.32
CHYYZHZ	818	110032009116	1	2009-04-28	2009	14	41	2011-04-09	4	277	L4	11197314	110032006021	11100519	C	C	CG	CT	11171	383.8	332.7	3.44	2.98
YLDCHCH	819	110055009096	1	2009-05-01	2009	2	41	2011-06-04	6	294	L4	11199095	110055003220	11100113	C	C	G		6125	215.6	181.2	3.52	2.96
YLDCHCH	820	110055009097	1	2009-05-01	2009	2	41	2011-08-15	8	314	L4	11199095	110055005179	11101927	C	C	G		11526	451.1	372.5	3.91	3.23
QUTOU	821	110044009085	1	2009-05-02	2009	8	41	2011-04-06	4	298	L4	11102912	110044007097	11101906	CG	CT	G	T	9073	232.1	314.5	2.56	3.47
SANFA	822	110046009086	1	2009-05-02	2009	9	41	2011-05-18	5	214	L4	11102129	110046007040	11101917	C	C	CG	C	9643	233.9	310.3	2.43	3.22
SANFA	823	110046009087	1	2009-05-02	2009	9	41	2011-05-26	5	269	L4	11102129	110046005164	11198391	CG	CT	CG	CT	7301	254.2	230.7	3.48	3.16
YLDXW	824	110064009080	1	2009-05-02	2009	12	41	2011-03-19	3	246	L4	11199095	110064007054	11104710	C	C	CG	CT	10737	347.6	346.4	3.24	3.23
QUTOU	825	110044009086	1	2009-05-03	2009	8	41	2011-04-05	4	299	L4	11102912	110044007113	11100519	C	C	G	T	10660	339.7	363.4	3.19	3.41
DRW	826	110043009126	1	2009-05-03	2009	17	41	2011-05-27	5	268	L4	11199095	110043006022	11102919	CG	CT	G	T	9673	323.9	309.9	3.35	3.2
YIZHUANG	827	110015009186	1	2009-05-04	2009	4	41	2011-07-11	7	260	L4	11101929	110015005486	2274879	G	T	G	T	11090	404.5	341.4	3.65	3.08
QUTOU	828	110044009087	1	2009-05-04	2009	8	41	2011-04-21	4	311	L4	11101906	010443024		G	T	G	T	11877	400.9	367.7	3.38	3.1
CHYYZHZ	829	110032009121	1	2009-05-05	2009	14	41	2011-06-17	6	300	L4	11197314	110032005184	11100113	C	C	CG	CT	9406	342.6	287.1	3.64	3.05
YLDXW	830	110064009084	1	2009-05-05	2009	12	41	2011-05-31	5	311	L4	11199095	110064005135	11197351	CG	CT	CG	CT	11916	375.4	374.8	3.15	3.15
QUTOU	831	110044009091	1	2009-05-06	2009	8	41	2011-03-29	3	271	L4	11102912	110044007081	11104737	CG	CT	G	T	8866	348.2	282	3.93	3.18
SANFA	832	110046009092	1	2009-05-06	2009	9	41	2011-06-20	6	244	L4	11102129	110046004056	11196018	C	C	CG	C	10140	377.7	307.3	3.72	3.03
DRW	833	110043009131	1	2009-05-06	2009	17	41	2011-06-18	6	302	L4	11101902	110043005100	11194166	G	T	G	T	10646	322.2	354.5	3.03	3.33
YLDXW	834	110064009085	1	2009-05-08	2009	12	41	2011-06-09	6	302	L4	11199095	110064007055	11104710	CG	CT	CG	CT	12072	390	368.5	3.23	3.05
YLDXW	835	110064009086	1	2009-05-08	2009	12	41	2011-04-22	4	288	L4	11199095	110064006053	11103560	CG	CT	G	T	12024	367.4	352.7	3.06	2.93
YLDLZHCH	836	110071009180	1	2009-05-09	2009	3	41	2011-04-17	4	266	L4	11102129	110071007074	15104167	CG	CT	CG	CT	13168	431.2	371.7	3.27	2.82
YIZHUANG	837	110015009193	1	2009-05-10	2009	4	41	2011-06-22	6	279	L4	11101902	110015004549	11199842	G	T	G	T	7483	236.6	220.8	3.16	2.95
YLDXW	838	110064009087	1	2009-05-10	2009	12	41	2011-06-02	6	309	L4	11199095	110064003239	11196046	CG	CT	CG	CT	8867	300.5	283.4	3.39	3.2
YLDXW	839	110064009088	1	2009-05-10	2009	12	41	2011-06-03	6	246	L4	11199095	110064003239	11196046	CG	CT	CG	CT	10002	369.6	328.4	3.7	3.28
DRW	840	110043009135	1	2009-05-10	2009	17	41	2011-05-16	5	307	L4	11199095	1100430Z7080	13104530	CG	CT	CG	CT	9955	359.1	311.5	3.61	3.13
YLDLZHCH	841	110071009181	1	2009-05-11	2009	3	41	2011-04-09	4	169	L3	11102129	110071007212	11101916	C	C	CG	C	10791	440.3	316.1	4.08	2.93
SANFA	842	110046009095	1	2009-05-11	2009	9	41	2011-05-25	5	179	L3	11102129	110046004102	11196100	CG	CT	CG	CT	3747	129.9	119.7	3.47	3.19
YLDCHCH	843	110055009103	1	2009-05-11	2009	2	41	2011-06-26	6	244	L4	11102912	110055007040	11101929	CG	CT	G	T	9460	342.1	299.9	3.62	3.17
NK4FCH	844	110037009118	1	2009-05-12	2009	6	41	2011-06-15	6	261	L4	11101929	110037007129	11101922	CG	CT	G	T	9708	323.6	319.2	3.33	3.29
YLDLZHCH	845	110071009183	1	2009-05-13	2009	3	41	2011-03-31	3	318	L4	11102912	110071007241	11100113	C	C	G	T	9431	343.7	321.4	3.64	3.41
YLDXW	846	110064009090	1	2009-05-13	2009	12	41	2011-04-13	4	266	L4	11199095	110064006028	31103117	CG	CT	G	T	8762	303.1	279.4	3.46	3.19
NK4FCH	847	110037009119	1	2009-05-14	2009	6	41	2011-07-04	7	273	L4	11103543	110037008829	11183696	CG	CT	G	T	9481	284.4	293.2	3	3.09
NK4FCH	848	110037009121	1	2009-05-14	2009	6	41	2011-04-08	4	241	L4	11199095	110037085221		C	C	G	T	10174	303.6	304.7	2.98	2.99
DRW	849	110043009149	1	2009-05-14	2009	17	41	2011-06-17	6	303	L4	11199095	1100430Z7121	11101916	CG	CT	CG	CT	11368	334.8	364.2	2.94	3.2
CHY	850	110056009120	1	2009-05-15	2009	15	41					11102912	110056007060	11103519	CG	CT	G	T
QUTOU	851	110044009098	1	2009-05-17	2009	8	41	2011-04-01	4	303	L4	11102912	110044007121	11100519	CG	CT	G	T	9345	352.9	304.5	3.78	3.26
YLDCHCH	852	110055009108	1	2009-05-18	2009	2	41	2011-05-07	5	294	L4	11102912	110055007038	11101929	C	C	G		10144	345.6	334.7	3.41	3.3
YIZHUANG	853	110015009198	1	2009-05-18	2009	4	41	2011-06-17	6	312	L4	11102912	110015007181	11102129	C	C	G	T	9377	371.1	291.6	3.96	3.11
NK3FCH	854	110038009111	1	2009-05-19	2009	7	41	2011-06-10	6	300	L4	11103543	110038007032	61204030	CG	CT	G	T	9094	298.5	282.4	3.28	3.1
QUTOU	855	110044009102	1	2009-05-19	2009	8	41	2011-05-05	5	297	L4	11101906	110044003091	11194165	CG	CT	CG	CT	9017	350.7	290.6	3.89	3.22
CHY	856	110056009124	1	2009-05-20	2009	15	41					11102912	110056007058		CG	CT	G	T
YLDXW	857	110064009093	1	2009-05-20	2009	12	41	2011-07-07	7	311	L4	11199995	110064007028	11100113	C	C	CG	CT	10443	351.5	336.7	3.37	3.22
YLDLZHCH	858	110071009188	1	2009-05-21	2009	3	41	2011-06-10	6	303	L4	11102129	110071007222	11101916	CG	CT	G	T	4314	167.6	129.8	3.89	3.01
SANFA	859	110046009098	1	2009-05-21	2009	9	41	2011-05-08	5	287	L4	11102129	110046005045	11196100	CG	CT	G	T	6959	260.8	229.2	3.75	3.29
CHYYZHZ	860	110032009137	1	2009-05-22	2009	14	41	2011-04-16	4	296	L4	11197314	110032005039	11101927	C	C	C	C	11213	446.2	327.2	3.98	2.92
CHY	861	110031609125	1	2009-05-22	2009	15	41	2011-06-23	6	257	L4	11102912	110056006046	11199095	CG	CT	G	T	10300	316.3	337.1	3.07	3.27
NK3FCH	862	110038009113	1	2009-05-22	2009	7	41	2011-05-25	5	286	L4	11103543	110038007065	11199095	CG	CT	G	T	10805	363.3	343.2	3.36	3.18
YLDCHCH	863	110055009112	1	2009-05-23	2009	2	41	2011-05-31	5	179	L3	11102912	110055007021	151-975	CG	CT	G	T	8320	313.8	242.8	3.77	2.92
NK3FCH	864	110038009114	1	2009-05-23	2009	7	41	2011-06-15	6	295	L4	11103543	110038006017	11101907	C	C	G	T	11274	338.1	342.3	3	3.04
QUTOU	865	110044009105	1	2009-05-23	2009	8	41	2011-05-09	5	293	L4	11102912	110044007116	11100519	C	C	G	T	9073	319.4	287.5	3.52	3.17
QUTOU	866	110044009104	1	2009-05-23	2009	8	41	2011-04-26	4	306	L4	11101902	110044005100	11197361	C	C		C	10260	341.2	345.6	3.33	3.37
SANFA	867	110046009099	1	2009-05-23	2009	9	41	2011-06-16	6	248	L4	11102129	110046004194	11196100	G	T	G	T	11450	374.4	353.2	3.27	3.08
YLDCHCH	868	110055009104	1	2009-05-24	2009	2	41	2011-07-28	7	303	L4	11102912	110055007081	11101929	CG	CT	G	T	12175	464.9	410.6	3.82	3.37
YIZHUANG	869	110015009202	1	2009-05-24	2009	4	41	2011-07-18	7	316	L4	11101929	110015005566	11197580	G	T	G	T	9579	317.4	321.9	3.31	3.36
NK4FCH	870	110037009134	1	2009-05-24	2009	6	41	2011-06-15	6	292	L4	11101929	110037007067	61204025	CG	CT	CG	CT	10035	363.3	326.6	3.62	3.25
DRW	871	110043009169	1	2009-05-26	2009	17	41	2011-05-04	5	291	L4	11199095	110043005095	11196018	C	C	G	CT	10344	392.6	332.4	3.8	3.21
QUTOU	872	110044009109	1	2009-05-27	2009	8	41	2011-08-02	8	264	L4	11101902	110044004062	11196023	CG	CT	CG	CT	4993	190.4	151.7	3.81	3.04
NJTH	873	110017Z09170	1	2009-05-27	2009	5	41	2011-06-01	6	295	L4	11199095	Z7059	11100113	C	C	G		11238	395.3	344.4	3.52	3.07
CHYYZHZ	874	110032009141	1	2009-05-29	2009	14	41	2011-05-25	5	288	L4	11197314	110032002140	11196046	CG	CT	CG	CT	7878	329.3	267.1	4.18	3.39
YLDLZHCH	875	110071009194	1	2009-05-29	2009	3	41	2011-06-24	6	289	L4	11102129	110071007244	11101916			G	CT	8147	339.8	256.9	4.17	3.15
YIZHUANG	876	110015009210	1	2009-05-29	2009	4	41	2011-06-28	6	301	L4	11101929	110015005563	11197580	G	T	G	T	9710	351.7	291.4	3.62	3
SANFA	877	110046009104	1	2009-05-29	2009	9	41	2011-06-14	6	250	L4	11102129	110046004146	11196100	C	C	CG		10309	371.8	305.6	3.61	2.96
SANFA	878	110046009105	1	2009-05-29	2009	9	41	2011-08-01	8	292	L4	11102129	110046007057	11101917	CG		CG	CT	12006	374.2	377.4	3.12	3.14
YIZHUANG	879	110015009212	1	2009-05-30	2009	4	41	2011-07-03	7	296	L4	11101929	110015002730	11197026			G		10105	376.7	338.8	3.73	3.35
YLDXW	880	110064009100	1	2009-05-30	2009	12	41	2011-06-30	6	318	L4	11199995	110064007067	32204854	C	C	CG	CT	10924	362.3	340	3.32	3.11
NK4FCH	881	110037009140	1	2009-06-01	2009	6	42	2011-07-15	7	231	L4	11199095	110037008659		C	C	CG	CT	10394	377.3	354.4	3.63	3.41
NK4FCH	882	110037009141	1	2009-06-01	2009	6	42	2011-05-11	5	359	L4	11101929	110037007113	11196035	C	C	CG	CT	10377	342.7	341.3	3.3	3.29
QUTOU	883	110044009111	1	2009-06-01	2009	8	42	2011-05-05	5	297	L4	11101906	110044005010	11196273	G	T	G	T	9755	374.9	324.9	3.84	3.33
SANFA	884	110046009108	1	2009-06-01	2009	9	42	2011-07-09	7	284	L4	11102129	110046005212	64103083	C	C	G		10798	387.1	338.8	3.59	3.14
CHYYZHZ	885	110032009147	1	2009-06-02	2009	14	42	2011-06-16	6	301	L4	11197314	110032000025	11194108	CG	CT	G	T	7069	293.9	224.3	4.16	3.17
YIZHUANG	886	110015009216	1	2009-06-02	2009	4	42	2011-07-29	7	305	L4	11101929	110015007178	11190107	G	T	G	T	11146	444	346.6	3.98	3.11
NK3FCH	887	110038009120	1	2009-06-02	2009	7	42	2011-06-07	6	303	L4	11103543	110038006082	11199095	C	C	CG	CT	9939	364.7	313.4	3.67	3.15
DRW	888	110043009175	1	2009-06-03	2009	17	42	2011-05-18	5	277	L4	11101916	110043005048	11199090	C	C	G	T	8934	277.4	272.9	3.1	3.05
CHYYZHZ	889	110032009149	1	2009-06-04	2009	14	42	2011-06-19	6	298	L4	11197314	110032005267	31103001	C	C	CG	CT	9647	398.5	307.4	4.13	3.19
DRW	890	110043009176	1	2009-06-04	2009	17	42	2011-05-01	5	294	L4	11101916	110043003226	11194166	CG	CT	CG	CT	11183	398	335.1	3.56	3
DRW	891	110043009177	1	2009-06-04	2009	17	42	2011-05-17	5	306	L4	11101916	110043005073	11196018	C	C	C	C	10106	395.7	334.1	3.92	3.31
YIZHUANG	892	110015009222	1	2009-06-05	2009	4	42	2011-06-30	6	299	L4	11101902	110015006578	11197580	G	T	G	T	10298	413.7	316.7	4.02	3.08
NK4FCH	893	110037009145	1	2009-06-06	2009	6	42	2011-06-17	6	290	L4	11103543	110037006016	11100260	C	C	G	T	10767	365.2	352.7	3.39	3.28
QUTOU	894	110044009411	1	2009-06-06	2009	8	42	2011-05-01	5	238	L4	11102912	01044W7086		C	C	G	T	7226	255	248.8	3.53	3.44
YLDLZHCH	895	110071009202	1	2009-06-07	2009	3	42	2011-06-11	6	302	L4	11102912	110071007249	11100113	C	C	G	CT	11096	416.7	333.8	3.76	3.01
QUTOU	896	110044009497	1	2009-06-07	2009	8	42	2011-07-09	7	288	L4	11101906	0104499052		C	C	CG	CT	8632	303.3	283.2	3.51	3.28
DRW	897	110043009180	1	2009-06-07	2009	17	42	2011-06-07	6	313	L4	11101916	110043005105	11199090	C	C	CG	CT	12226	437.6	390.7	3.58	3.2
YLDCHCH	898	110055009122	1	2009-06-08	2009	2	42	2011-07-23	7	308	L4	11102912	110055007059	31104461	C	C	C	C	11336	452	365.8	3.99	3.23
YIZHUANG	899	110015009231	1	2009-06-08	2009	4	42	2011-07-15	7	319	L4	11101902	110015006509	11197580		CT	G	T	11857	473.1	363.4	3.99	3.07
QUTOU	900	110044009117	1	2009-06-08	2009	8	42	2011-05-14	5	260	L4	11101906	110044006092	11197580	G	T	G	T	10418	383.9	321.7	3.68	3.09
NJTH	901	110017J09230	1	2009-06-08	2009	5	42	2011-06-01	6	295	L4	11101902	110015006509	11197580	CG	CT	G	T	10018	374.7	337.8	3.74	3.37
QUTOU	902	110044009412	1	2009-06-09	2009	8	42	2011-05-16	5	314	L4	11199095	01044W3147		G	T	G	T	7146	275.3	234.9	3.85	3.29
YLDXW	903	110064009109	1	2009-06-09	2009	12	42	2011-06-18	6	266	L4	11199095	110064006062	13203027	CG	CT	G	T	6642	231.6	212.5	3.49	3.2
DRW	904	110043009183	1	2009-06-09	2009	17	42	2011-08-11	8	192	L3	11101916	110043006061	11196018	C	C	C	C	6829	256.3	224.4	3.75	3.29
YLDCHCH	905	110055009123	1	2009-06-10	2009	2	42	2011-06-12	6	313	L4	11102912	110055007046	11196529	C	C	G		10800	400.1	333.1	3.7	3.08
QUTOU	906	110044009453	1	2009-06-10	2009	8	42	2011-06-15	6	312	L4	11197314	01044320603		CG	CT	G	T	8925	330.2	290.2	3.7	3.25
YLDXW	907	110064009112	1	2009-06-10	2009	12	42	2011-06-06	6	278	L4	11199095	110064006052	41103814	CG	CT	G	T	11438	361.1	354.7	3.16	3.1
YLDXW	908	110064009113	1	2009-06-11	2009	12	42	2011-07-30	7	224	L4	11199095	110064007071	41104806		CT	CG	CT	10414	371.3	313.4	3.57	3.01
CHYYZHZ	909	110032009156	1	2009-06-12	2009	14	42	2011-06-26	6	319	L4	11102912	110032007127	11100519	CG	CT	CG	CT	8255	295.9	261.9	3.58	3.17
NK3FCH	910	110038009126	1	2009-06-12	2009	7	42	2011-07-11	7	269	L4	11103543	110038007072	11199095	CG	CT	G	T	7771	240	250.6	3.09	3.22
NK3FCH	911	110038009127	1	2009-06-12	2009	7	42	2011-07-01	7	249	L4	11199095	110038003185	11197314	CG	CT	CG	CT	9395	251.6	275.5	2.68	2.93
QUTOU	912	110044009120	1	2009-06-12	2009	8	42	2011-07-13	7	284	L4	11102912	110044007141	11102912	C	C	G	T	8407	343.4	276	4.08	3.28
NK3FCH	913	110038009131	1	2009-06-13	2009	7	42	2011-07-17	7	295	L4	11103543	110038006065	11199095	CG	CT	G	T	10105	407.5	311.9	4.03	3.09
DRW	914	110043009185	1	2009-06-13	2009	17	42	2011-06-13	6	307	L4	11199095	110043006036	11102919	CG	CT	G	T	11459	439	373.5	3.83	3.26
DRW	915	110043009186	1	2009-06-13	2009	17	42	2011-06-07	6	313	L4	11101916	110043004278	11199090	G	T	G	T	8416	317	261.5	3.77	3.11
CHYYZHZ	916	110032009161	1	2009-06-14	2009	14	42	2011-06-23	6	294	L4	11199095	110032007100	11198391	C	C	C	C	9344	401.3	295.7	4.3	3.16
DRW	917	110043009189	1	2009-06-14	2009	17	42	2011-06-11	6	281	L4	11101916	1100430Z7111	32204002	C	C	C	C	9561	291.6	313.9	3.05	3.28
DRW	918	110043009191	1	2009-06-14	2009	17	42	2011-06-21	6	299	L4	11101916	1100430Z6177	11100113	C	C	CG	CT	9666	345.3	313	3.57	3.24
QUTOU	919	110044009428	1	2009-06-15	2009	8	42	2011-05-26	5	304	L4	11101916	01044Z4058		C	C	C	C	11033	385.4	351.6	3.49	3.19
NJTH	920	110017Z09193	1	2009-06-15	2009	5	42	2011-07-01	7	290	L4	11101916	7099	11197580	CG	CT	CG	CT	11480	393.6	339.7	3.43	2.96
DRW	921	110043009195	1	2009-06-16	2009	17	42	2011-07-12	7	313	L4	11101916	110043005051	11199090	CG	CT	CG	CT	12518	446.3	376.5	3.57	3.01
YIZHUANG	922	110015009245	1	2009-06-17	2009	4	42	2011-07-20	7	279	L4	11101902	110015004550	11198748	CG	CT		CT	10416	412.4	337.3	3.96	3.24
NK3FCH	923	110038009133	1	2009-06-18	2009	7	42	2011-06-21	6	321	L4	11103543	110038024218	11100113	C	C	CG	CT	11392	393.7	352.7	3.46	3.1
XJ1D	924	110001009090	1	2009-06-18	2009	11	42	2011-06-27	6	295	L4	11103543	110001105189	11102129					11772	427.4	349.8	3.63	2.97
YIZHUANG	925	110015009248	1	2009-06-19	2009	4	42	2011-08-15	8	253	L4	11101902	110015001099	11196015			G	T	11310	431.7	348.7	3.82	3.08
DRW	926	110043009198	1	2009-06-19	2009	17	42	2011-06-01	6	291	L4	11101916	110043098216	11190502	C	C	CG	C	10848	389.7	349.5	3.59	3.22
DRW	927	110043009199	1	2009-06-19	2009	17	42	2011-06-13	6	307	L4	11101916	1100430Z7077	43104062	C	C	CG	CT	10726	340.8	349.3	3.18	3.26
NK4FCH	928	110037009161	1	2009-06-20	2009	6	42	2011-07-09	7	300	L4	11199095	1100370A0074	11196015	CG	CT	CG	CT	10152	352.4	326.2	3.47	3.21
YIZHUANG	929	110015009251	1	2009-06-21	2009	4	42	2011-07-24	7	310	L4	11101929	110015004470	5902195	G	T	G	T	10813	379.9	355	3.51	3.28
DRW	930	110043009201	1	2009-06-21	2009	17	42	2011-06-01	6	319	L4	11101916	110043007064	13104530	CG	CT	G	T	7710	239.2	264.7	3.1	3.43
YLDXW	931	110064009120	1	2009-06-22	2009	12	42	2011-05-28	5	287	L4	11199095	110064004245	11197351	CG	CT	CG	CT	11103	425	360	3.83	3.24
YLDXW	932	110064009121	1	2009-06-23	2009	12	42	2011-07-18	7	300	L4	11199095	110064006055	11103560	C	C	G	CT	9920	369.7	309.5	3.73	3.12
YLDXW	933	110064009122	1	2009-06-23	2009	12	42	2011-07-14	7	267	L4	11199095	110064007031	11100113	C	C	G	T	11404	347.7	354.8	3.05	3.11
YIZHUANG	934	110015009254	1	2009-06-24	2009	4	42	2011-07-08	7	291	L4	11101929	110015004431	1189528	CG	CT	CG	CT	8692	340.9	280.5	3.92	3.23
YIZHUANG	935	110015009255	1	2009-06-24	2009	4	42	2011-08-18	8	314	L4	11101929	110015004916	1172414	G	T	G	T	10467	391.3	342.1	3.74	3.27
NK3FCH	936	110038009137	1	2009-06-24	2009	7	42	2011-07-14	7	266	L4	11199095	110038001113		CG	CT	G	T	4788	154.3	155.1	3.22	3.24
YLDXW	937	110064009125	1	2009-06-24	2009	12	42	2011-08-12	8	303	L4	11102912	110064007101	11100113	CG	CT	G	T	10329	378	348.7	3.66	3.38
QUTOU	938	110044009413	1	2009-06-26	2009	8	42	2011-05-04	5	270	L4	11199995	01044W5247		CG	CT	CG	CT	9949	352.3	305.5	3.54	3.07
QUTOU	939	110044009414	1	2009-06-27	2009	8	42	2011-05-29	5	273	L4	11102912	01044W7095		C	C	G	T	12014	357.2	367.9	2.97	3.06
YLDLZHCH	940	110071009219	1	2009-06-28	2009	3	42	2011-05-14	5	302	L4	11101916	110071005509	H01167794	CG	CT	CG		10057	493.3	334.3	4.9	3.32
NK3FCH	941	110038009140	1	2009-06-28	2009	7	42	2011-07-20	7	292	L4	11103543	110038005018	3102717	G	T	G	T	11237	343.2	336.6	3.05	3
NK3FCH	942	110038009123	1	2009-06-30	2009	7	42	2011-06-07	6	303	L4	11103543	110038005003	11100260	CG	CT	CG	CT	11132	335.1	352.5	3.01	3.17
YIZHUANG	943	110015009269	1	2009-07-01	2009	4	42	2011-08-07	8	296	L4	11101929	110015007148	31104173				CT	11127	387.3	361.8	3.48	3.25
YIZHUANG	944	110015009272	1	2009-07-02	2009	4	42	2011-08-04	8	299	L4	11101902	110015005715	11101930	G	T	G	T	11533	370.4	329.3	3.21	2.86
YLDCHCH	945	110055009137	1	2009-07-03	2009	2	42	2011-06-06	6	292	L4	11199095	110055005080	11196100	G	T	G	T	12742	440	401.9	3.45	3.15
QUTOU	946	110044009416	1	2009-07-03	2009	8	42	2011-05-28	5	274	L4	11199995	0104404200		C	C	CG	CT	7430	273.4	256.4	3.68	3.45
YLDXW	947	110064009136	1	2009-07-03	2009	12	42	2011-06-05	6	306	L4	11102912	110064007097	11100113	C	C	CG	CT	10919	377.3	340.8	3.46	3.12
YLDCHCH	948	110055009138	1	2009-07-04	2009	2	42	2011-07-11	7	284	L4	11199095	110055007044	64104147	CG	CT	G	T	10842	370.3	345.8	3.42	3.19
XJ1D	949	110001009100	1	2009-07-04	2009	11	42	2011-07-26	7	232	L4	11103543	110001107038	11101917	C	C	G	T	11205	404.7	351.3	3.61	3.14
QUTOU	950	110044009427	1	2009-07-05	2009	8	42	2011-07-02	7	295	L4	11101916	01044Z4122		CG	CT	CG	CT	8992	365.5	306.5	4.06	3.41
YLDXW	951	110064009139	1	2009-07-05	2009	12	42	2011-06-30	6	318	L4	11199095	110064007042	61204027	CG	CT	G	T	11917	379.5	386.6	3.18	3.24
YLDLZHCH	952	110071009225	1	2009-07-06	2009	3	42	2011-06-07	6	306	L4	11102129	110071004260	11194115		CT		CT	7532	288.1	210.1	3.82	2.79
YLDXW	953	110064009140	1	2009-07-06	2009	12	42	2011-06-16	6	295	L4	11102912	110064007100	11100113	CG	CT	G	T	9996	357.7	312.5	3.58	3.13
YLDCHCH	954	110055009140	1	2009-07-07	2009	2	42	2011-08-18	8	311	L4	11102912	110055007024	11101929	G	T	G	T	10874	387.7	366	3.57	3.37
YLDCHCH	955	110055009141	1	2009-07-08	2009	2	42	2011-08-09	8	291	L4	11199095	110055007049	11196529	C	C	G		9518	309.6	303.3	3.25	3.19
YLDLZHCH	956	110071009230	1	2009-07-08	2009	3	42	2011-06-02	6	311	L4	11102912	110071007299	11100113	CG	CT	CG	CT	10967	357.7	332.4	3.26	3.03
NK3FCH	957	110038009152	1	2009-07-08	2009	7	42	2011-06-18	6	262	L4	11199095	110038007049	11102909	CG	CT	G	T	11426	341.5	367.3	2.99	3.21
DRW	958	110043009219	1	2009-07-08	2009	17	42	2011-06-29	6	263	L4	11101916	110043005157	11196035	G	T	G	T	9982	401.7	333	4.02	3.34
CHY4D	959	110033009136	1	2009-07-09	2009	16	42	2011-07-20	7	293	L4	11197314	110033006033	11102912	CG	CT	G	T	8994	351.2	285.8	3.91	3.18
QUTOU	960	110044009143	1	2009-07-09	2009	8	42	2011-08-09	8	292	L4	11101902	110044004122	11196023	G	T	G	T	11898	396.5	350.3	3.33	2.94
DRW	961	110043009220	1	2009-07-09	2009	17	42	2011-07-08	7	317	L4	11101916	110043005156	11199090	CG	CT	G	T	11914	436	357.9	3.66	3
YLDXW	962	110064009141	1	2009-07-10	2009	12	42	2011-07-28	7	290	L4	11102912	110064007107	11100113	C	C	G	T	10015	349.3	315.1	3.49	3.15
YLDXW	963	110064009142	1	2009-07-10	2009	12	42	2011-07-12	7	306	L4	11102912	110064007106	11100113	C	C	CG	CT	11821	377.9	369.7	3.2	3.13
YIZHUANG	964	110015009298	1	2009-07-12	2009	4	42	2011-08-08	8	295	L4	11101929	110015005370	1059681	G		G		9634	345.1	310.7	3.58	3.23
DRW	965	110043009224	1	2009-07-12	2009	17	42	2011-06-21	6	299	L4	11101916	110043006052	11102919	G	T	G	T	9704	315.9	320.2	3.26	3.3
DRW	966	110043009225	1	2009-07-12	2009	17	42	2011-05-26	5	297	L4	11101916	110043002086	11197310	C	C	CG		9938	437.4	342.3	4.4	3.44
YIZHUANG	967	110015009300	1	2009-07-13	2009	4	42	2011-08-03	8	300	L4	11101902	110015004538	11194115	CG	CT	CG	CT	8469	364.3	274.7	4.3	3.24
NK4FCH	968	110037009204	1	2009-07-13	2009	6	42	2011-07-19	7	290	L4	11199095	110037008737		CG	CT	G	T	6438	202.8	212.5	3.15	3.3
QUTOU	969	110044009146	1	2009-07-13	2009	8	42	2011-06-24	6	275	L4	11101902	110044004155	11196023	CG	CT	CG	CT	10835	412.1	318	3.8	2.93
DRW	970	110043009227	1	2009-07-13	2009	17	42	2011-06-22	6	298	L4	11101916	110043005074	11199090	CG	CT	CG	CT	11976	491.8	384.1	4.11	3.21
DRW	971	110043009228	1	2009-07-13	2009	17	42	2011-06-29	6	291	L4	11101916	110043005099	11194166	CG	CT	G	T	12377	421.1	363.6	3.4	2.94
YLDCHCH	972	110055009144	1	2009-07-14	2009	2	42	2011-07-29	7	211	L4	11199095	110055006032	13203023	CG	CT	CG	CT	4866	179.3	168.6	3.69	3.47
YLDLZHCH	973	110071009242	1	2009-07-14	2009	3	42	2011-05-27	5	317	L4	11101916	110071006147	11101930	CG	CT	G	T	11094	378.3	338.8	3.41	3.05
YLDLZHCH	974	110071009243	1	2009-07-14	2009	3	42	2011-08-19	8	268	L4	11101916	110071005534		CG	CT	CG	CT	10432	368.6	333.1	3.53	3.19
YIZHUANG	975	110015009307	1	2009-07-14	2009	4	42	2011-07-25	7	274	L4	11102129	110015004412	1064343	C	C	CG	C	10123	435	318.7	4.3	3.15
YLDXW	976	110064009143	1	2009-07-17	2009	12	42	2011-08-13	8	274	L4	11199095	110064005037	11197351	CG	CT	CG	CT	9931	290.2	326.6	2.92	3.29
YLDXW	977	110064009145	1	2009-07-19	2009	12	42	2011-08-14	8	273	L4	11199995	110064007069	32204854	CG	CT	CG	CT	9728	320.7	304	3.3	3.12
DRW	978	110043009231	1	2009-07-19	2009	17	42	2011-06-23	6	297	L4	11101916	110043003041	11196018	C	C	G	T	9315	248.2	316.7	2.66	3.4
YIZHUANG	979	110015009325	1	2009-07-20	2009	4	42	2011-07-24	7	275	L4	11101929	110015003620	11197314	CG	CT	CG	CT	9885	368.4	332.7	3.73	3.37
DRW	980	110043009234	1	2009-07-20	2009	17	42	2011-07-19	7	306	L4	11102910	110043006114	11102919	CG	CT	G	T	12516	344.3	393.8	2.75	3.15
QUTOU	981	110044009155	1	2009-07-22	2009	8	42	2011-06-06	6	293	L4	11101906	110044006028	12103157	G	T	G	T	9575	304.9	299.1	3.18	3.12
QUTOU	982	110044009156	1	2009-07-22	2009	8	42	2011-07-16	7	281	L4	11102912	110044005234	11196100	C	C	G	T	11020	408.2	332.2	3.7	3.01
DRW	983	110043009236	1	2009-07-22	2009	17	42	2011-08-03	8	319	L4	11101916	110043006097	11102919	G	T	G	T	12491	437.4	392.9	3.5	3.15
YLDCHCH	984	110055009154	1	2009-07-23	2009	2	42	2011-07-26	7	334	L4	11199095	110055004156	11100113	C	C	CG	CT	9215	357.6	306.6	3.88	3.33
YLDLZHCH	985	110071009255	1	2009-07-23	2009	3	42	2011-07-01	7	282	L4	11102912	110071007291	11101930	C	C	CG	CT	9902	395	306.8	3.99	3.1
YIZHUANG	986	110015009329	1	2009-07-23	2009	4	42	2011-08-03	8	265	L4	11101902	110015002694	11197026	CG	CT	CG	CT	10432	441.2	349.6	4.23	3.35
YLDXW	987	110064009147	1	2009-07-23	2009	12	42	2011-05-28	5	314	L4	11102912	110064007120	11100113	C	C	CG	CT	11671	390.8	372.4	3.35	3.19
YLDLZHCH	988	110071009257	1	2009-07-24	2009	3	42	2011-06-17	6	268	L4	11102912	110071007334	11101916		CT	G	T	11025	376.4	336.5	3.41	3.05
YLDCHCH	989	110055009155	1	2009-07-25	2009	2	42	2011-07-21	7	310	L4	11199095	110055001255	11195006	G	T	G	T	10824	348.8	335.7	3.22	3.1
YIZHUANG	990	110015009336	1	2009-07-26	2009	4	42	2011-07-16	7	318	L4	11101929	110015005831	970231	CG	CT	CG	CT	10873	415	350.7	3.82	3.23
YIZHUANG	991	110015009337	1	2009-07-26	2009	4	42	2011-08-01	8	302	L4	11101929	110015004891	1110075	CG	CT	G	T	10867	448.7	354.6	4.13	3.26
YLDCHCH	992	110055009158	1	2009-07-27	2009	2	42	2011-08-08	8	292	L4	11199095	110055006137	11194165		CT	CG	CT	9364	338.8	287.5	3.62	3.07
QUTOU	993	110044009162	1	2009-07-27	2009	8	42	2011-07-26	7	306	L4	11101902	110044005241	11196100	CG	CT	G	T	9036	346.5	279.5	3.83	3.09
YIZHUANG	994	110015009341	1	2009-07-28	2009	4	42	2011-08-09	8	294	L4	11101929	110015004572	11198748	CG	CT	CG	CT	10106	387.5	325	3.84	3.22
YIZHUANG	995	110015009344	1	2009-07-29	2009	4	42	2011-08-05	8	298	L4	11101902	110015005474	130940335	CG	CT	CG	CT	11411	466.9	377.7	4.09	3.31
YIZHUANG	996	110015009348	1	2009-07-31	2009	4	42	2011-07-26	7	273	L4	11101929	110015005621	11100113	CG	CT	G	T	11575	453.3	365.4	3.92	3.16
QUTOU	997	110044009419	1	2009-07-31	2009	8	42	2011-06-27	6	300	L4	11102912	01044W7139		C	C	CG	CT	11587	347.9	367.8	3	3.17
DRW	998	110043009250	1	2009-07-31	2009	17	42	2011-07-22	7	268	L4	11102910	110043006126	11197351	C	C	CG	CT	9682	357.7	321.6	3.69	3.32
QUTOU	999	110044009425	1	2009-08-01	2009	8	42	2011-07-10	7	322	L4	11199095	01044Z4130		C	C	G	T	10890	365.3	332.3	3.35	3.05
NJTH	1000	110017N09179	1	2009-08-01	2009	5	42	2011-07-01	7	290	L4	11103543	6127	11102909	CG	CT	G	T	11302	442.9	371.1	3.92	3.28
YLDXW	1001	110064009157	1	2009-08-02	2009	12	42	2011-08-05	8	245	L4	11199095	110064005088	11197351	C	C	G	CT	7883	259.4	258.7	3.29	3.28
DRW	1002	110043009253	1	2009-08-03	2009	17	42	2011-07-16	7	309	L4	11199095	1100430Z7165	11101917	CG	CT	CG	CT	11278	374.5	349.5	3.32	3.1
DRW	1003	110043009254	1	2009-08-03	2009	17	42	2011-07-30	7	260	L4	11199095	110043007143	131601389	G	T	G	T	8879	269.9	297	3.04	3.35
QUTOU	1004	110044009170	1	2009-08-07	2009	8	42	2011-06-19	6	280	L4	11101906	110044006016	41103017	C	C	CG		11105	446.5	339.5	4.02	3.06
DRW	1005	110043009259	1	2009-08-07	2009	17	42	2011-07-15	7	275	L4	11102910	1100430Z7176	11100113	CG	CT	G	T	10203	259.9	325.1	2.55	3.19
YLDLZHCH	1006	110071009283	1	2009-08-09	2009	3	42	2011-07-30	7	288	L4	11101929	110071005099	11194165	CG	CT	CG	CT	11384	339.5	371.3	2.98	3.26
QUTOU	1007	110044009172	1	2009-08-09	2009	8	42	2011-07-06	7	263	L4	11101902	110044006049	7175748	C	C	CG	CT	10063	363.1	317.5	3.61	3.16
BJ5D	1008	110023009172	1	2009-08-09	2009	10	42					11102912	110026003274	11100113	C	C	G	T
YIZHUANG	1009	110015009380	1	2009-08-10	2009	4	42	2011-07-29	7	305	L4	11101929	110015003431	1167794	CG	CT	CG	CT	8459	388.8	294.3	4.6	3.48
YLDXW	1010	110064009164	1	2009-08-10	2009	12	42	2011-08-08	8	307	L4	11199995	110064002038	11194166	C	C	C	C	12669	398.9	385.9	3.15	3.05
DRW	1011	110043009263	1	2009-08-12	2009	17	42	2011-07-28	7	262	L4	11102910	1100430Z6090	11196035	C	C	CG	CT	10017	318.2	304.8	3.18	3.04
QUTOU	1012	110044009469	1	2009-08-14	2009	8	42	2011-08-12	8	254	L4	11102129	01044102294		C	C	CG	CT	9965	390.6	314.5	3.92	3.16
YLDLZHCH	1013	110071009294	1	2009-08-16	2009	3	42	2011-06-26	6	322	L4	11101929	110071005611					CT	9457	394.1	298.7	4.17	3.16
QUTOU	1014	110044009484	1	2009-08-16	2009	8	42	2011-07-25	7	307	L4	11101929	01044246060		G	T	G	T	7472	263	250.1	3.52	3.35
YLDLZHCH	1015	110071009296	1	2009-08-17	2009	3	42	2011-08-05	8	247	L4	11101929	110071005601	A00010062	G	T	G	T	10742	394.7	348.6	3.67	3.24
YLDLZHCH	1016	110071009301	1	2009-08-18	2009	3	42	2011-06-29	6	319	L4	11101929	110071005640	A00011306	G	T	G	T	9619	341.1	307.1	3.55	3.19
QUTOU	1017	110044009420	1	2009-08-19	2009	8	42	2011-07-21	7	311	L4	11199095	01044W6082		G		G	T	10390	347	318	3.34	3.06
DRW	1018	110043009272	1	2009-08-20	2009	17	42	2011-08-04	8	290	L4	11199095	110043007133	11100113	CG	T	G	T	11674	416.8	360.9	3.57	3.09
YLDLZHCH	1019	110071009317	1	2009-08-22	2009	3	42	2011-07-17	7	301	L4	11101929	110071005048		CG		G	T	11510	317	344.1	2.75	2.99
YIZHUANG	1020	110015009431	1	2009-08-25	2009	4	42	2011-08-14	8	289	L4	11102129	110015004460	1073619	CG	CT	G	T	10365	374.6	317	3.61	3.06
SANFA	1021	110046009166	1	2009-08-26	2009	9	42	2011-07-24	7	300	L4	11199995	110046002047	11197314	CG	CT	CG		9151	327.7	297.6	3.58	3.25
YIZHUANG	1022	110015009436	1	2009-08-27	2009	4	42	2011-08-16	8	252	L4	11101902	110015003648	11199095	G	T	G	T	9345	340.6	282.5	3.64	3.02
QUTOU	1023	110044009430	1	2009-08-31	2009	8	42	2011-08-02	8	299	L4	11102910	01044Z1030		CG	CT	G	T	10740	424.8	345.8	3.95	3.22
YIZHUANG	1024	110015009455	1	2009-09-02	2009	4	43	2011-08-12	8	291	L4	11102129	110015003711	7175748	CG	CT	G	T	10021	384.2	300.8	3.83	3
YIZHUANG	1025	110015009457	1	2009-09-02	2009	4	43	2011-08-17	8	251	L4	11101902	110015008233	11194166	G	T	G	T	10405	396.2	320.6	3.81	3.08
YIZHUANG	1026	110015009465	1	2009-09-03	2009	4	43	2011-08-15	8	288	L4	11197314	110015007420	11101908	G	T	G	T	12600	432.5	380.5	3.43	3.02
YLDXW	1027	110064009201	1	2009-09-14	2009	12	43	2011-08-12	8	275	L4	11199995	110064005065	11197351	CG	CT	G	T	8528	301.7	282.8	3.54	3.32
